# Supplementary material for: UPLC-QTOF-MS-based metabolomics and chemometrics studies of geographically diverse C. torulosa needles
Source: Royal Society of Chemistry journal article supplement (doi:10.1039/d4ay01654h), 2025-01-01
Supplement: d4ay01654h1.pdf [file d4ay01654h1.pdf]

## Supplementary information

### UPLC-QTOF-MS-based metabolomics and chemometrics studies of geographically diverse *C. torulosa* needles

Radhika Khanna <sup>a\*</sup>, Khushaboo Bhadoriya <sup>a</sup>, Gaurav Pandey <sup>a</sup>, V.K. Varshney <sup>a\*</sup>

<sup>a</sup> Chemistry & Bioprospecting Division, Forest Research Institute, Dehradun 248006, India

<sup>a\*</sup> khannaradhika113@gmail.com, vkvarshney1967@gmail.com, Chemistry & Bioprospecting Division, Forest Research Institute, Dehradun 248006, India

Manuscript ID: AY-ART-09-2024-001654

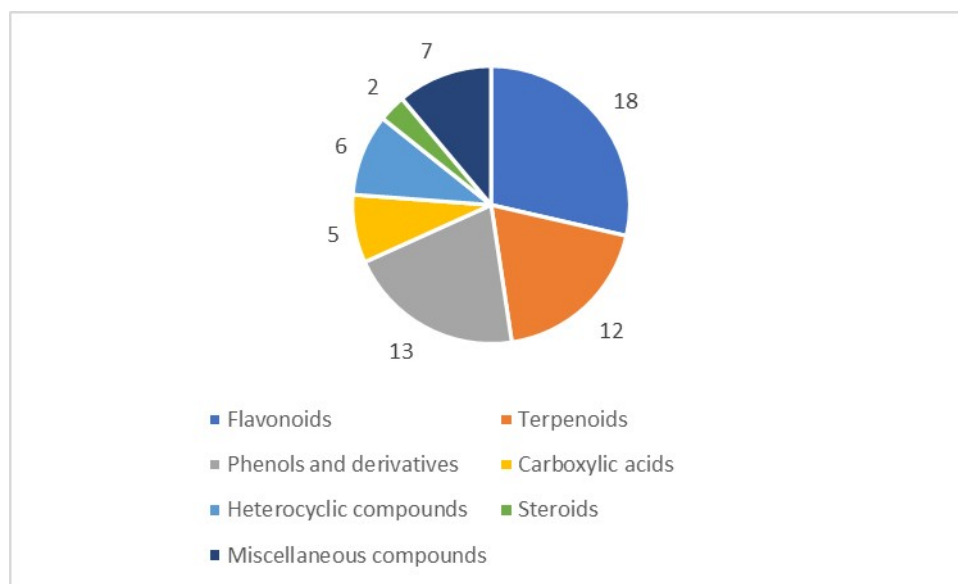

**Figure1SI: Pie chart showing different classes of identified compounds**

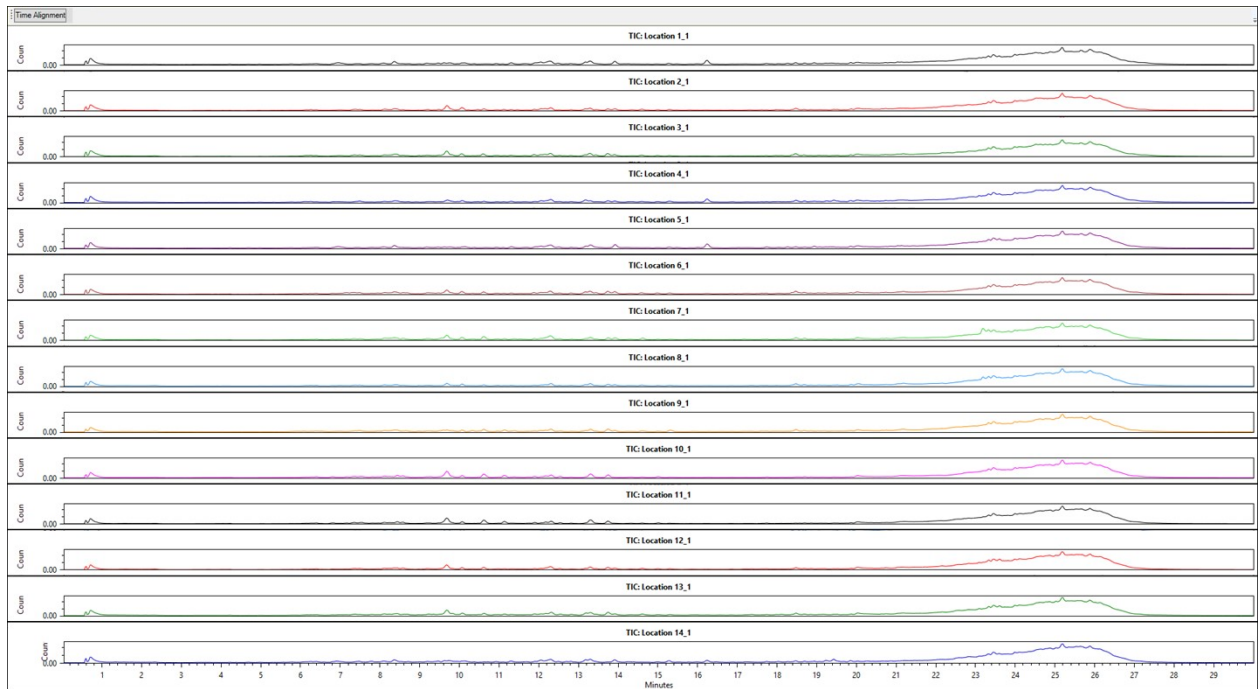

**Figure 2 SI: Total Ion Chromatograms (TICs) of 25% aqueous methanol extracts of needles of *Cupressus torulosa* growing in 14 different geographical locations**

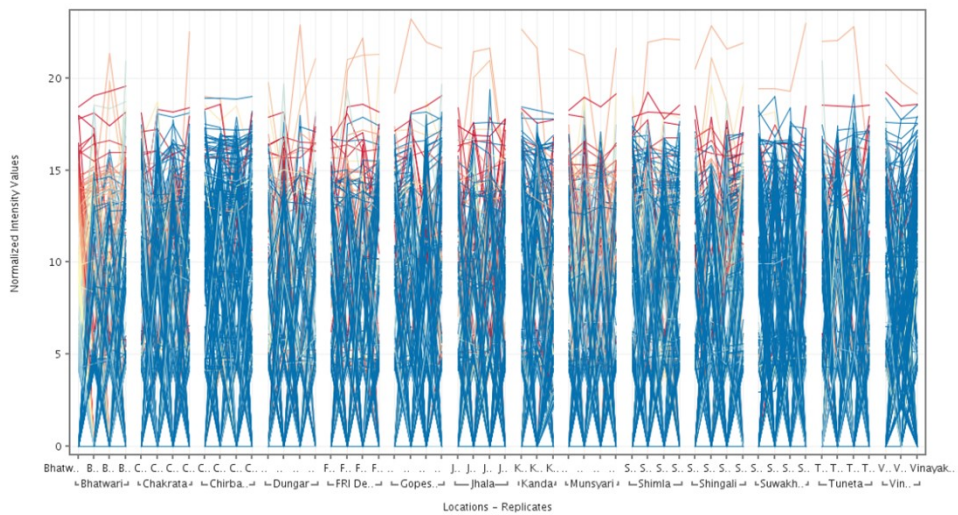

**Figure 3SI: Profile plot representing intensity of detected ions across different geographical locations**

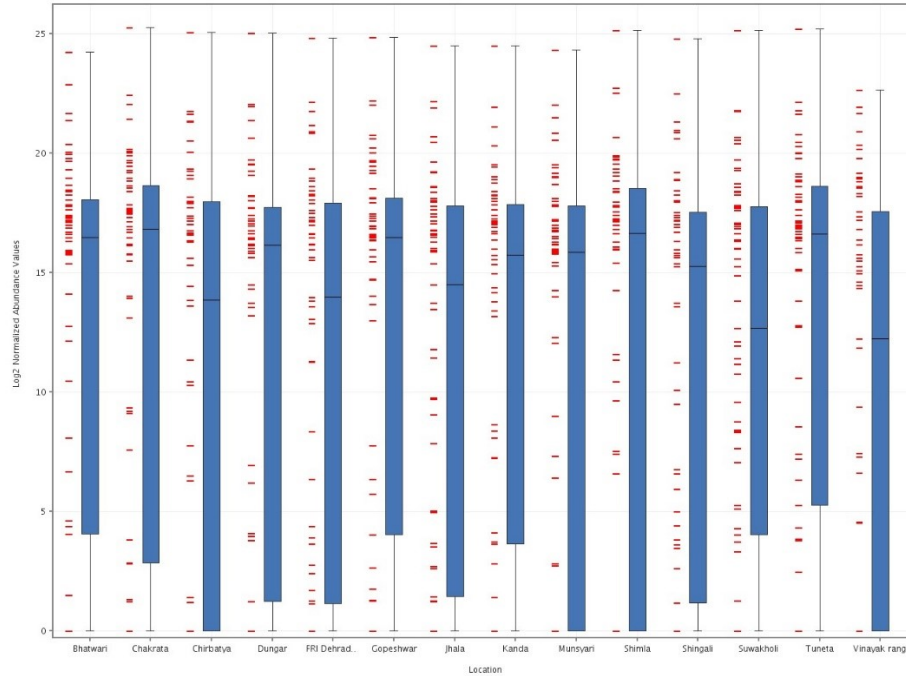

**Figure 4SI: Box-whisker plot of identified compounds**

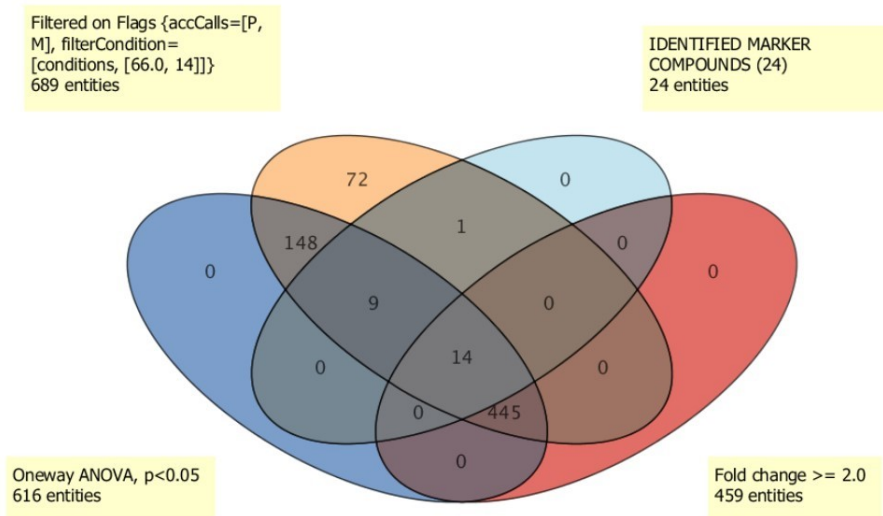

**Figure 5SI: Vienn diagram representing marker compounds**

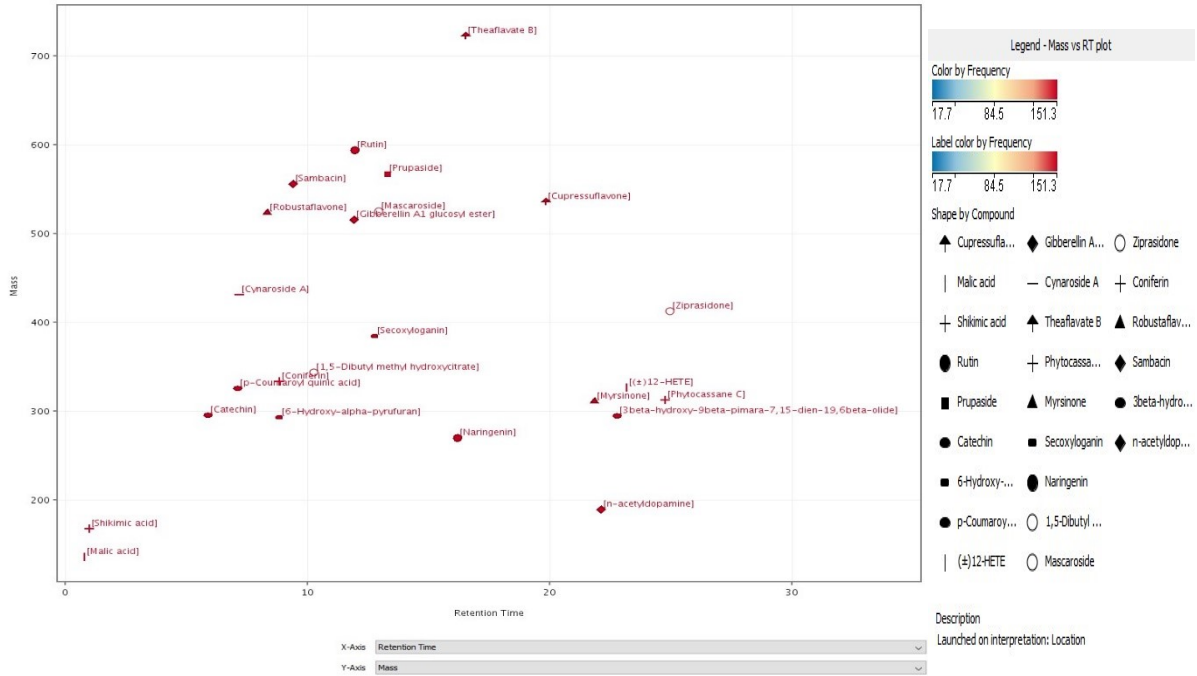

**Figure 6SI: Mass v/s Retention Time (RT) plot of marker compounds**

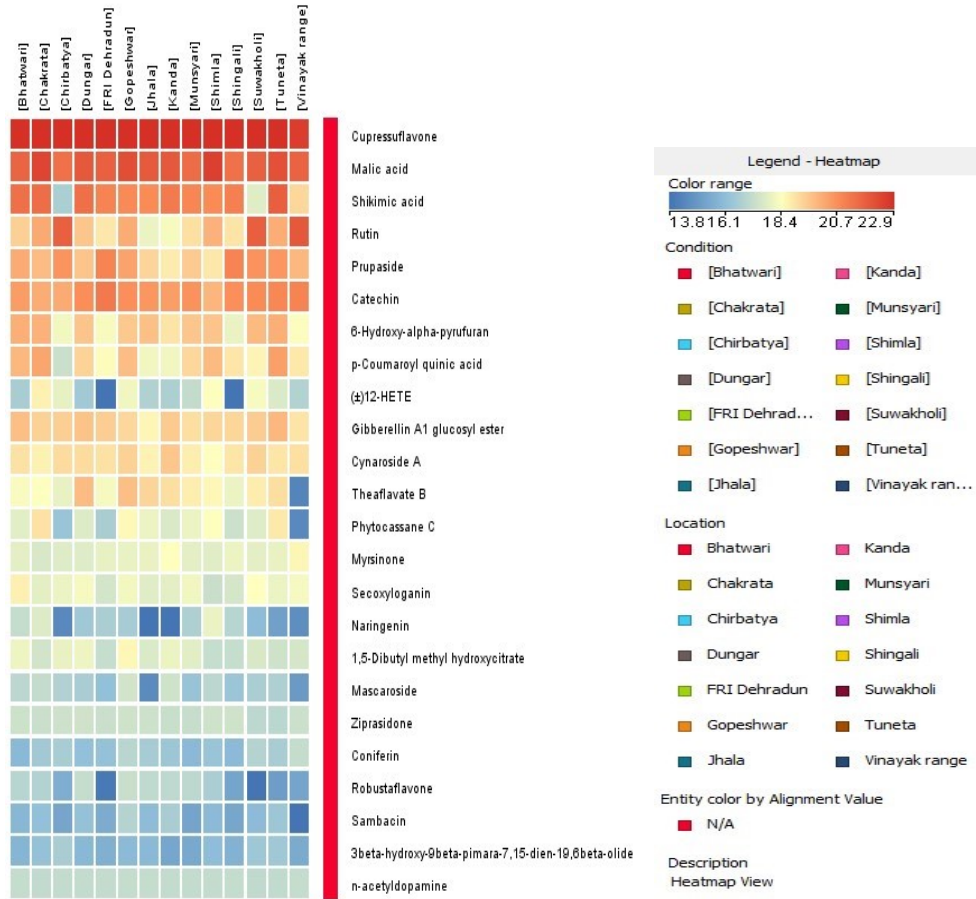

**Figure 7SI: Heat map of marker compounds**

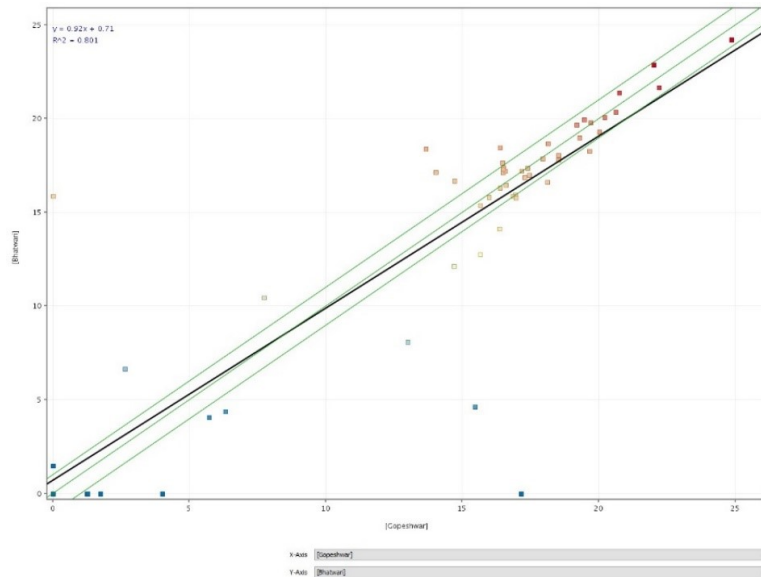

**Figure 8SI: Scatter plot of Gopeshwar v/s Bhatwari**

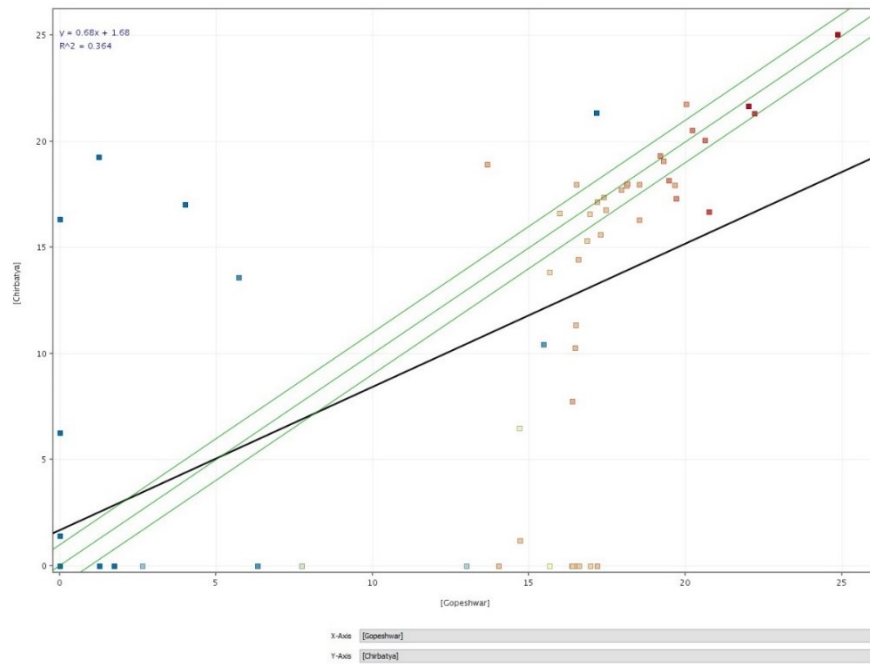

**Figure 9SI: Scatter plot of Gopeshwar v/s Chirbatya**

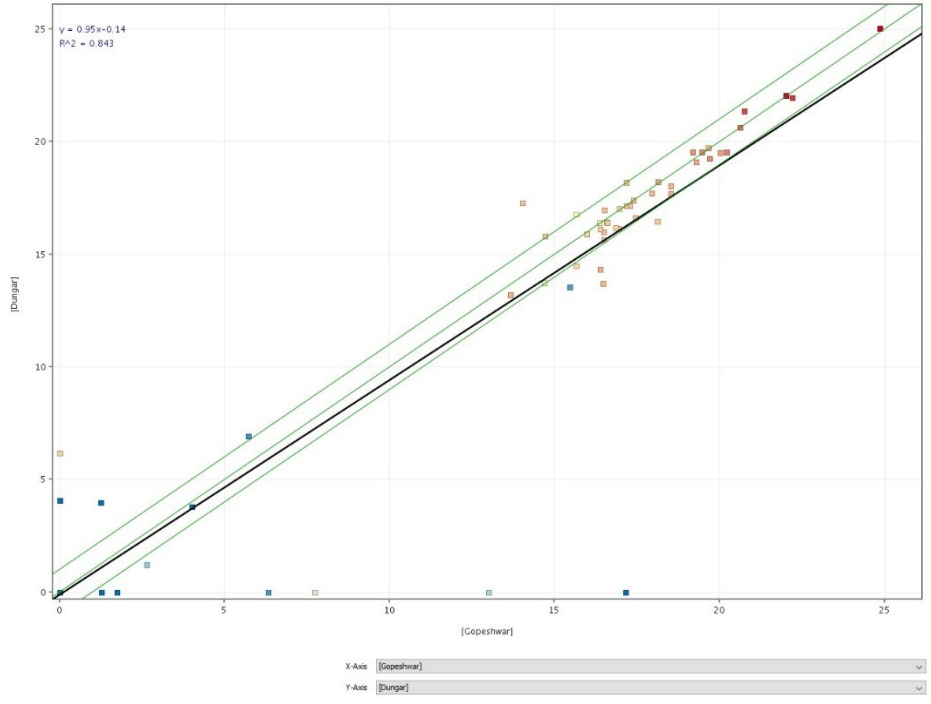

**Figure 10SI: Scatter plot of Gopeshwar v/s Dungaar**

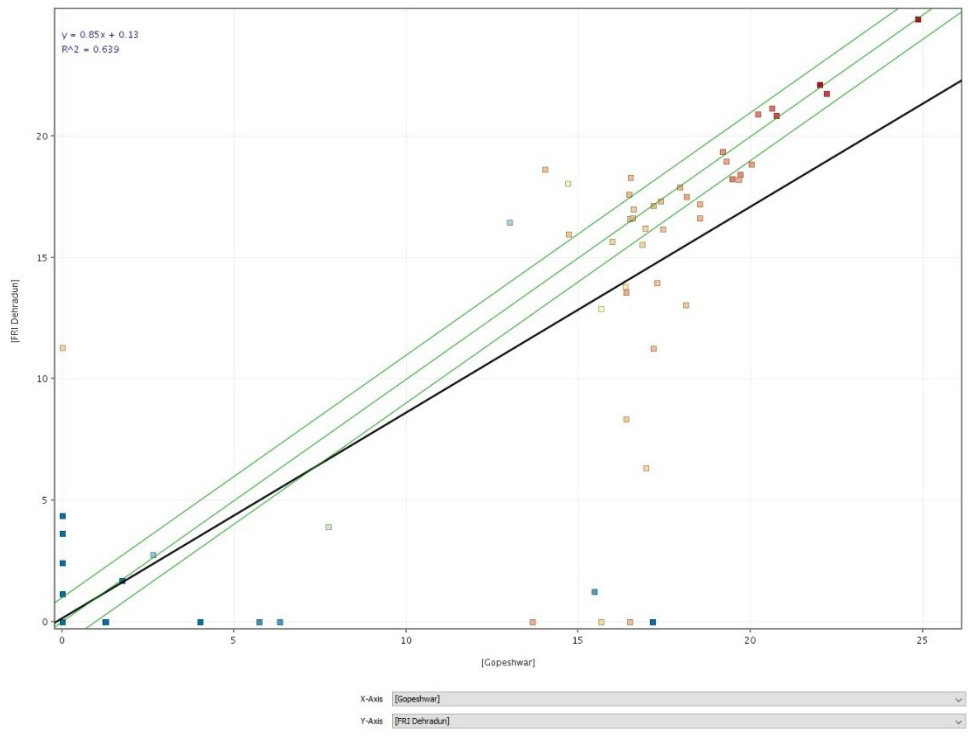

**Figure 11SI: Scatter plot of Gopeshwar v/s FRI (Dehradun)**

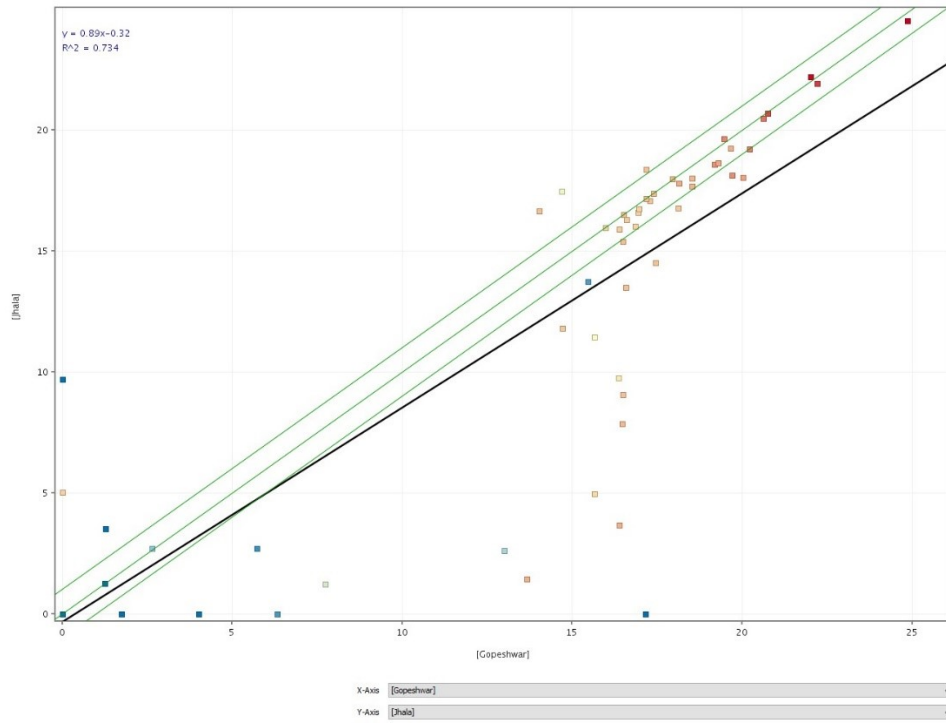

**Figure 12SI: Scatter plot of Gopeshwar v/s Jhala**

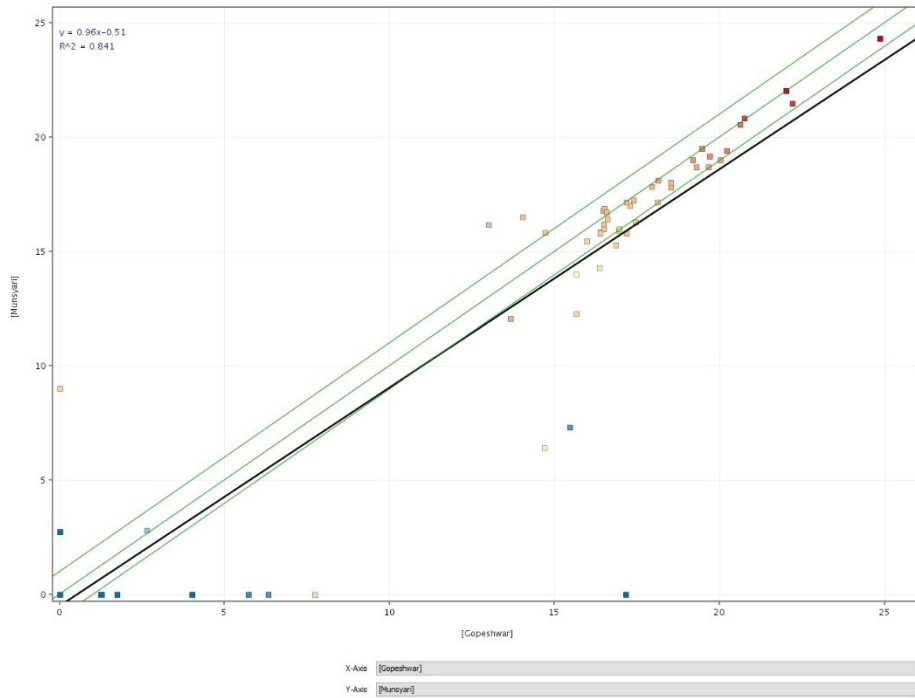



**Figure 13SI: Scatter plot of Gopeshwar v/s Munsyari**

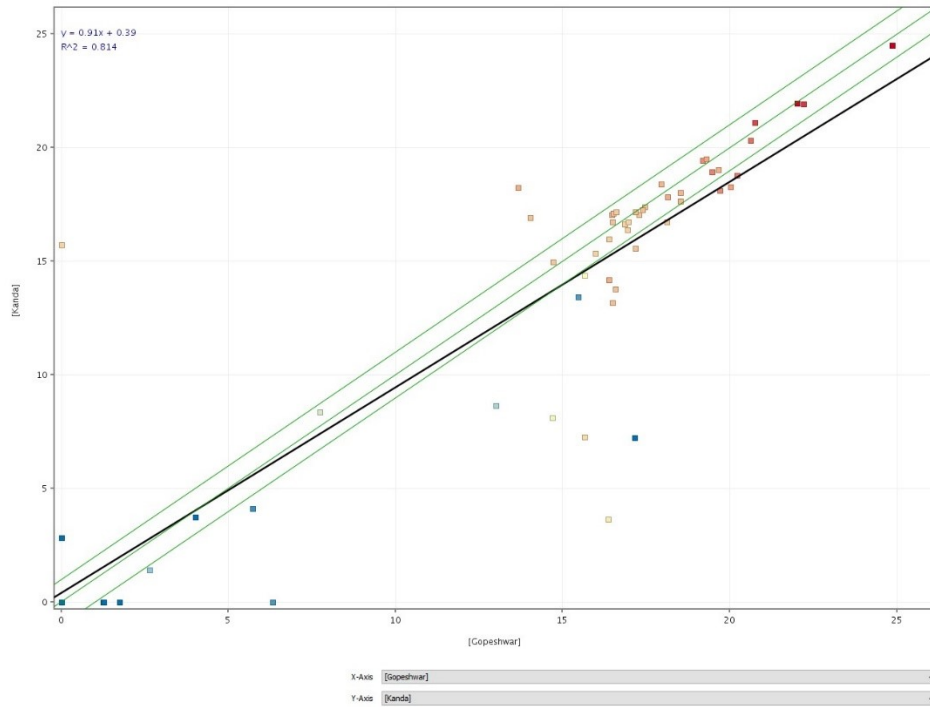

**Figure 14SI: Scatter plot of Gopeshwar v/s Kanda**

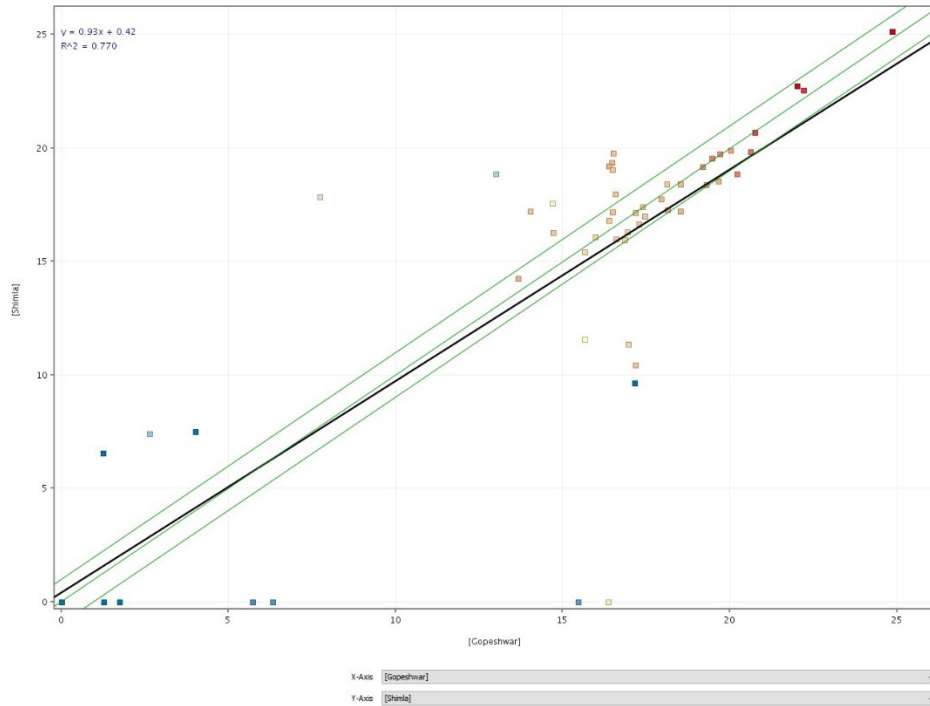

**Figure 15SI: Scatter plot of Gopeshwar v/s Shimla**

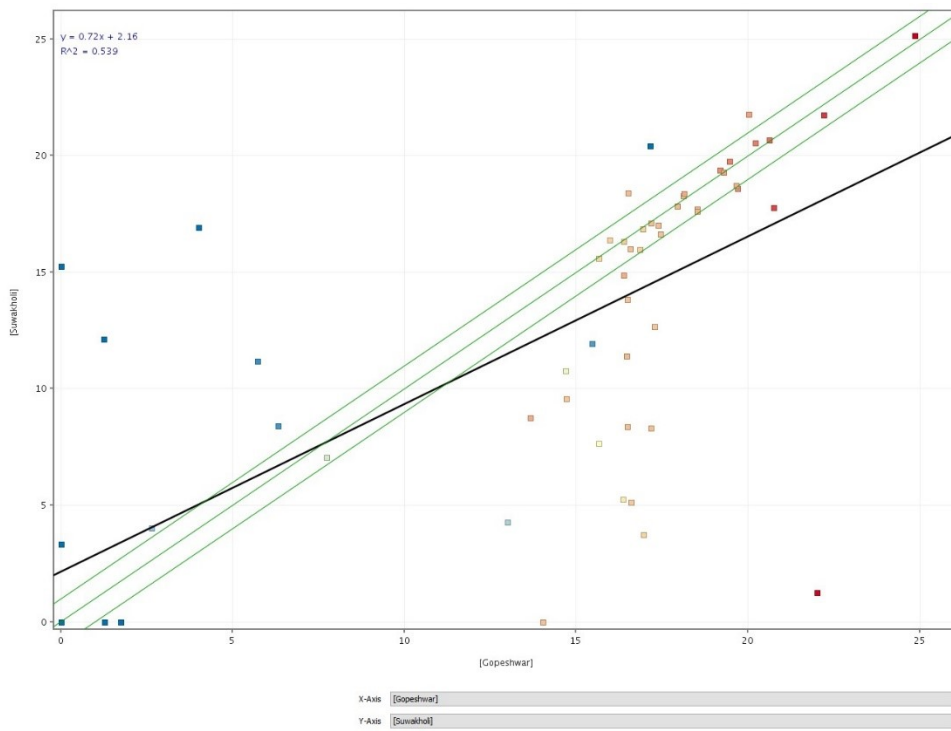

**Figure 16SI: Scatter plot of Gopeshwar v/s Suwakholi**

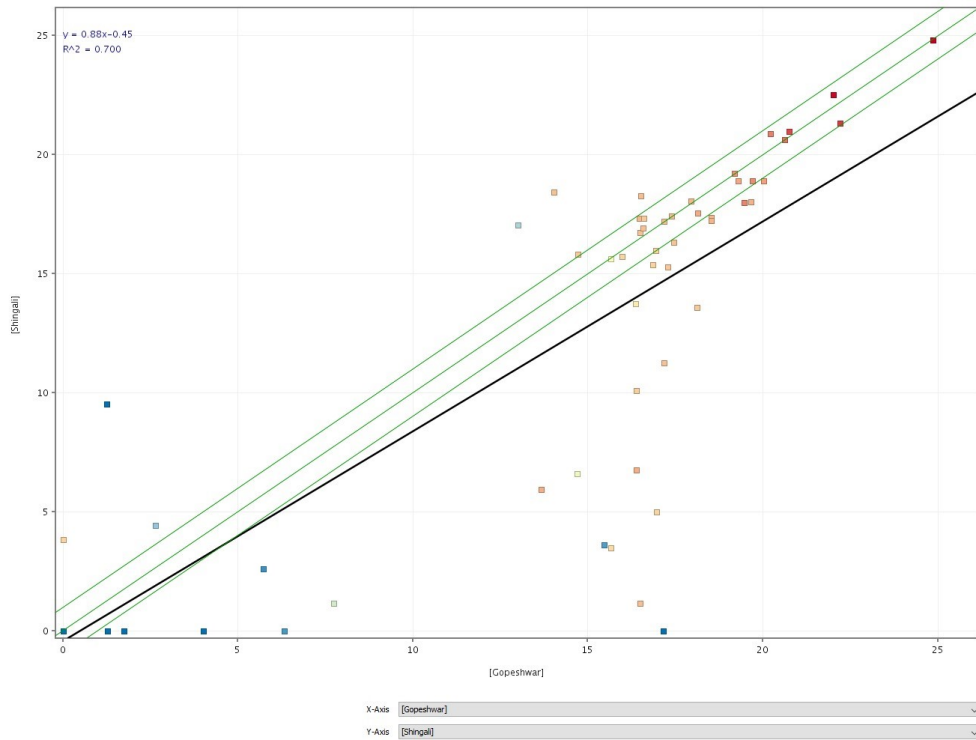

**Figure 17SI: Scatter plot of Gopeshwar v/s Shingali**

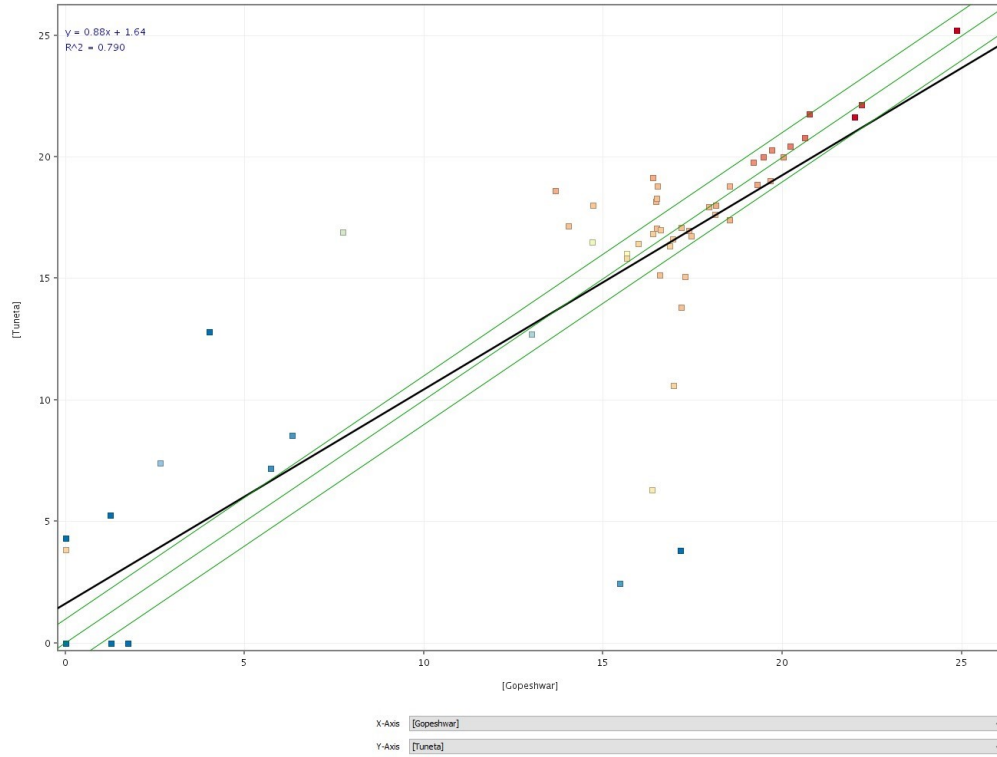

**Figure 18SI: Scatter plot of Gopeshwar v/s Tuneta**

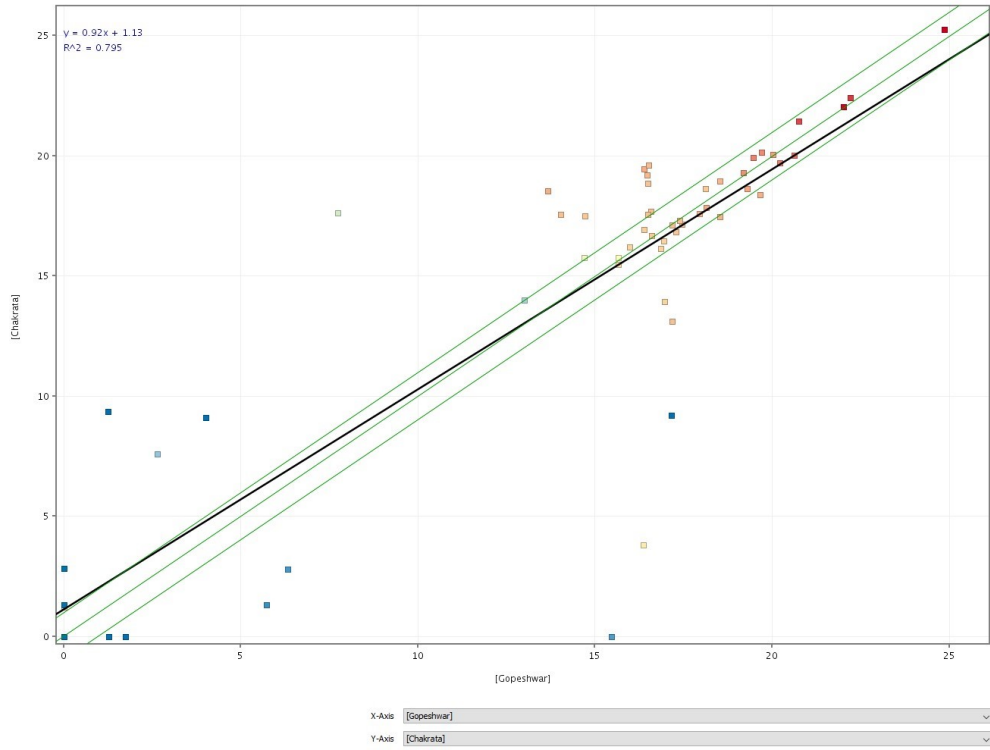

**Figure 19SI: Scatter plot of Gopeshwar v/s Chakrata**

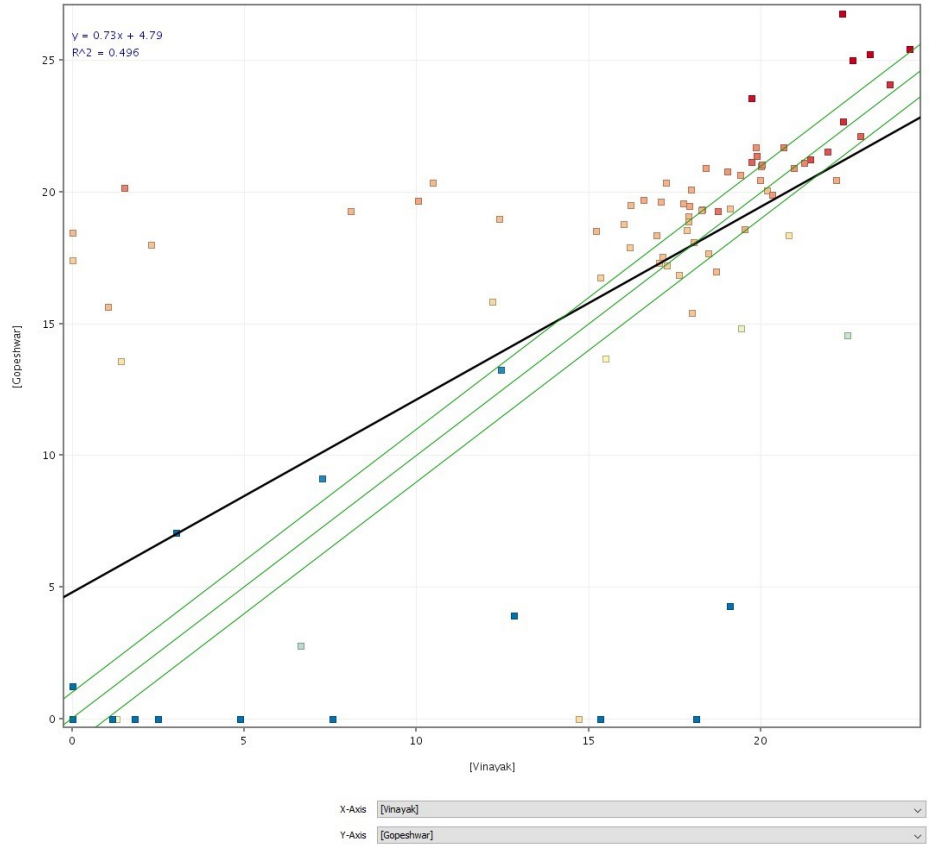

**Figure 20SI: Scatter plot of Gopeshwar v/s Vinayak**

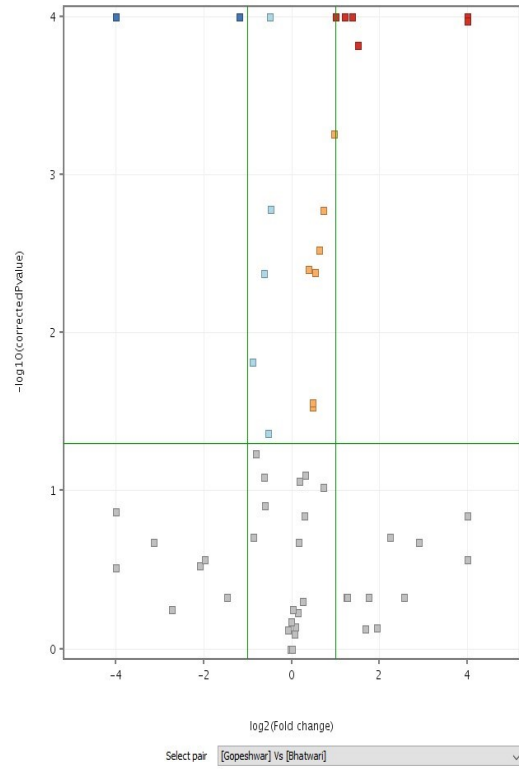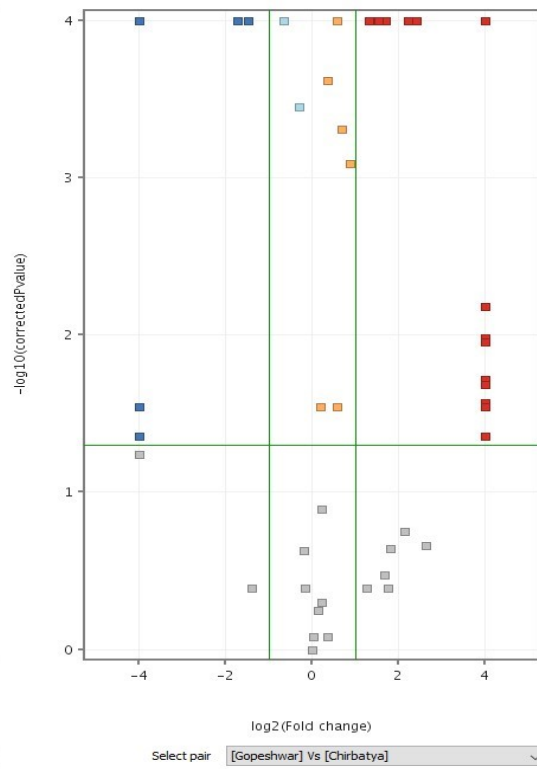

**Figure 21SI: Volcano plot of Gopeshwar v/s Bhatwari**      **Figure 22SI: Volcano plot of Gopeshwar v/s Chirbatya**

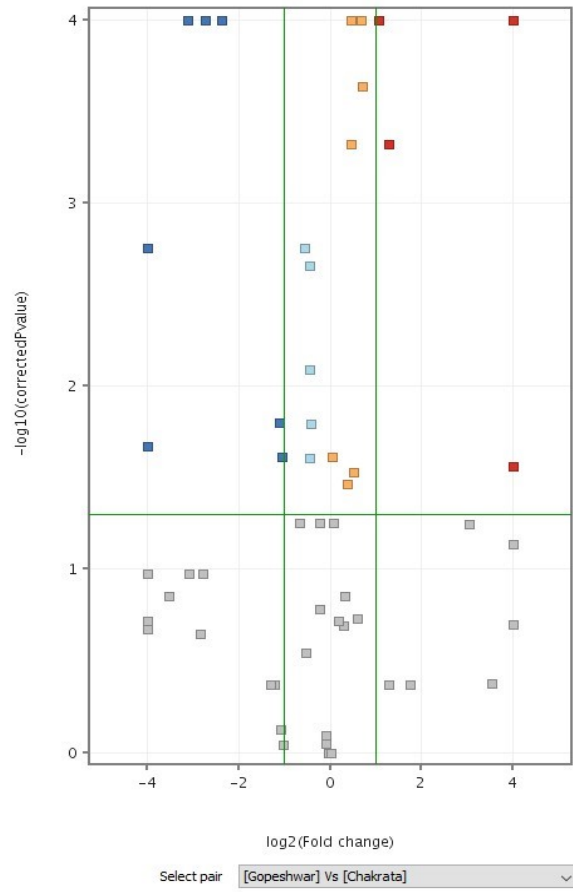

**Figure 23SI: Volcano plot of Gopeshwar v/s Chakrata**

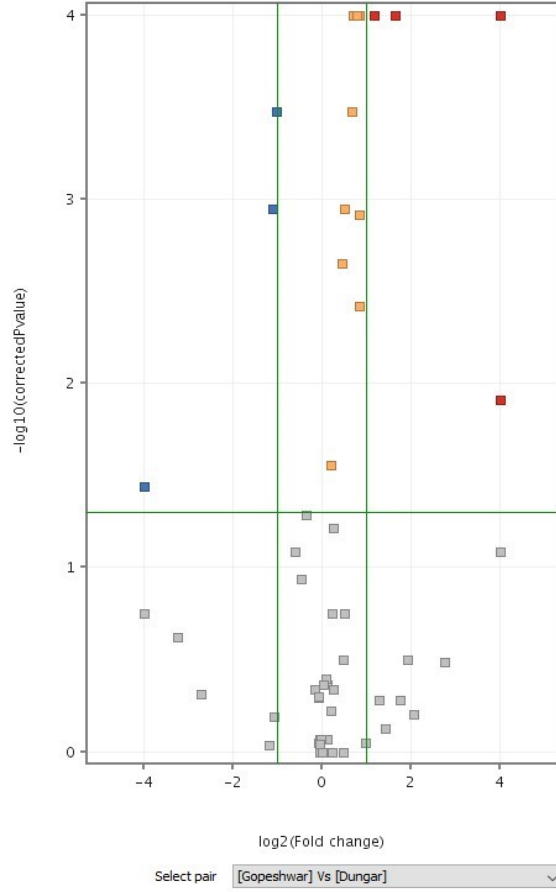

**Figure 24SI: Volcano plot of Gopeshwar v/s Dungal**



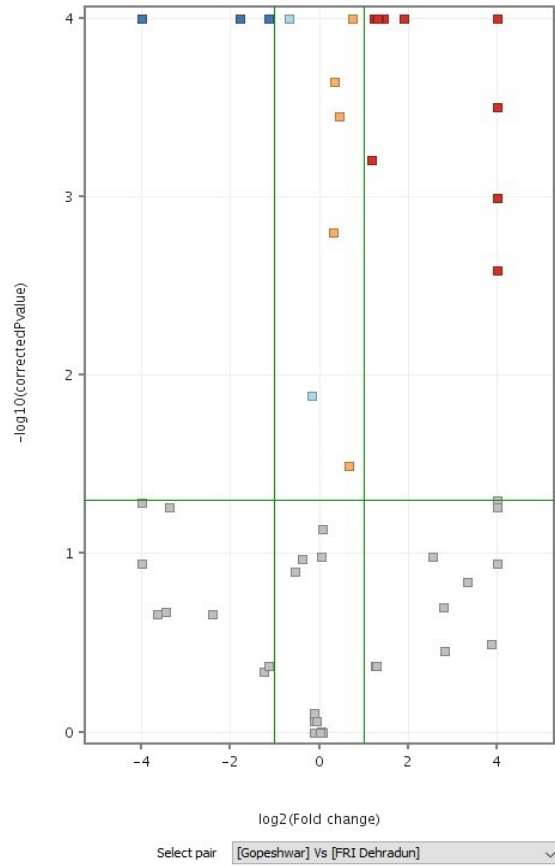

**Figure 25SI: Volcano plot of Gopeshwar v/s FRI (Dehradun)**

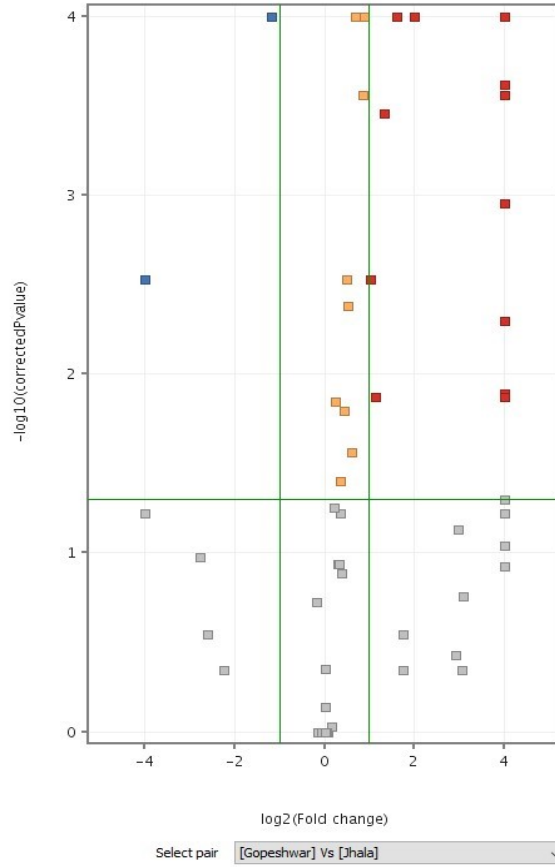

**Figure 26SI: Volcano plot of Gopeshwar v/s Jhala**

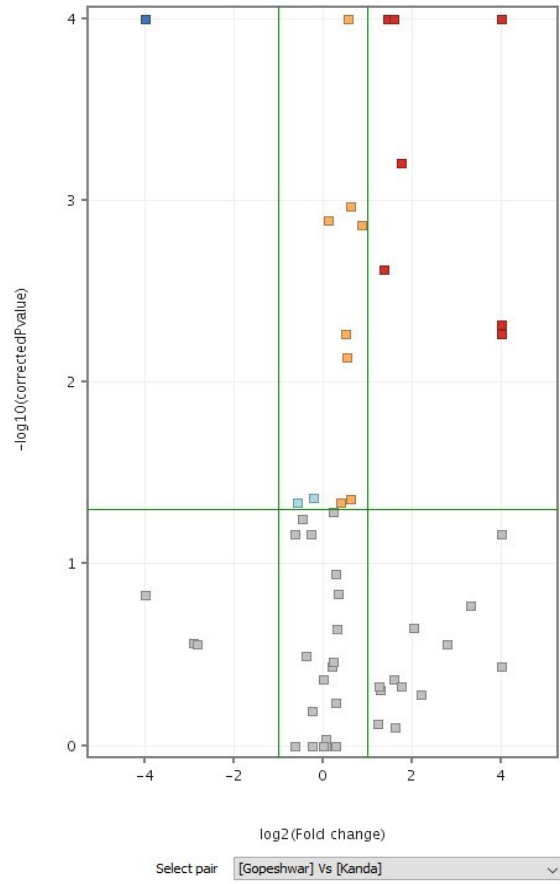

**Figure 27SI: Volcano plot of Gopeshwar v/s Kanda**

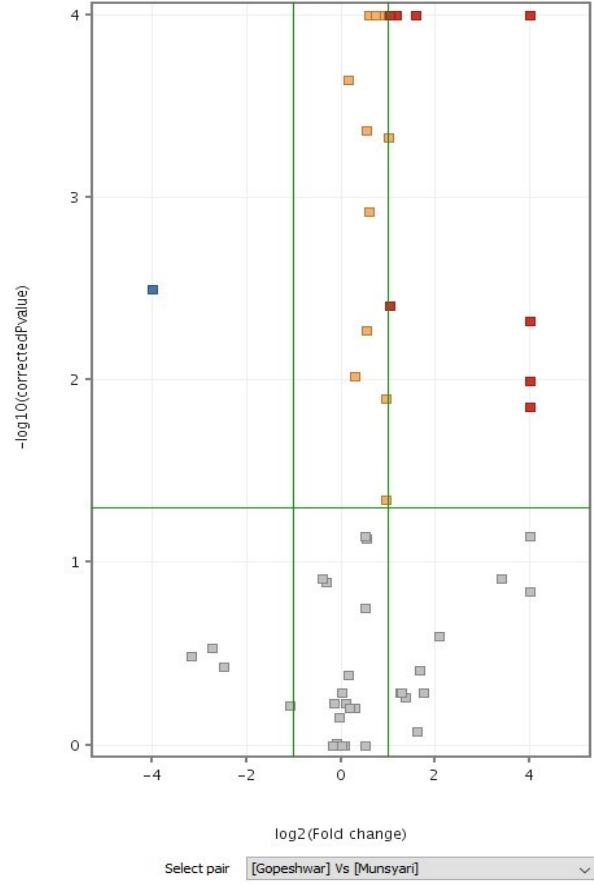

**Figure 28SI: Volcano plot of Gopeshwar v/s Munsyari**

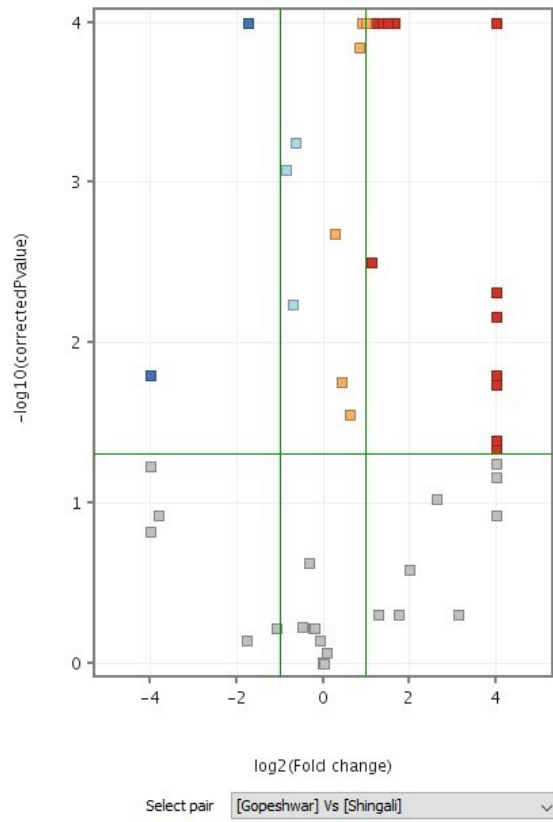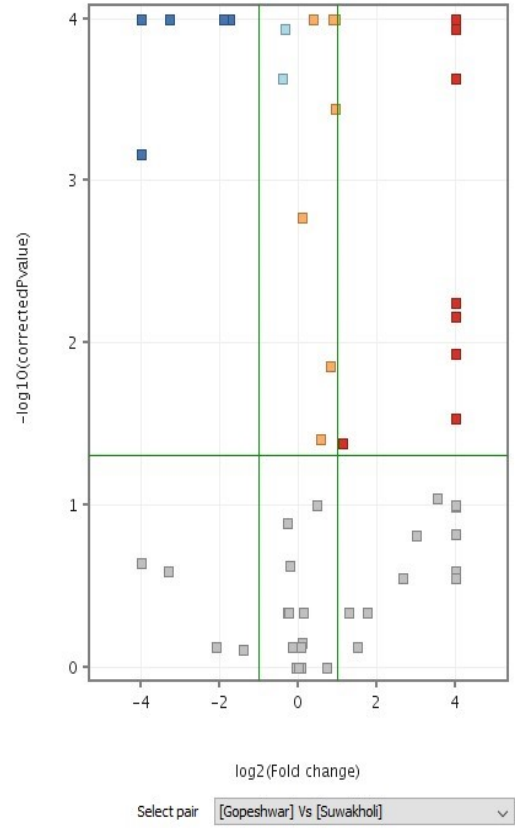

**Figure 29SI: Volcano plot of Gopeshwar v/s Shingali** **Figure 30SI: Volcano plot of Gopeshwar v/s Suwakholi**

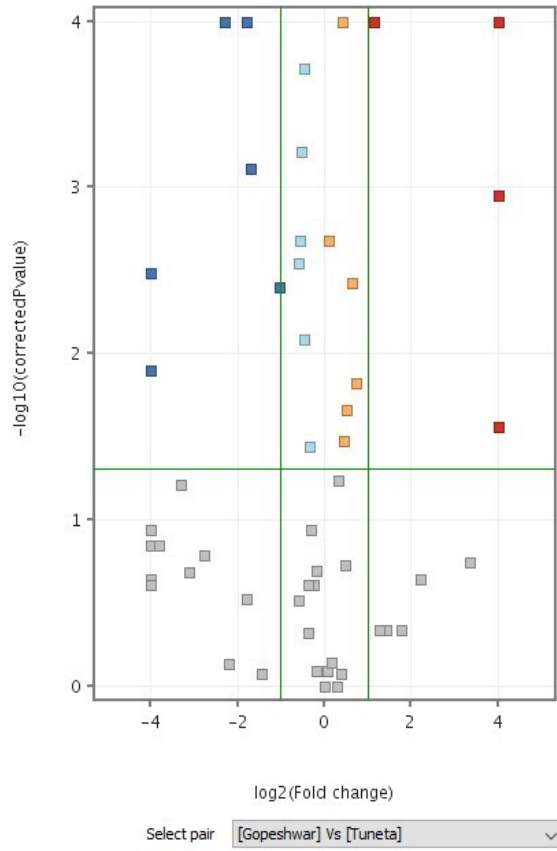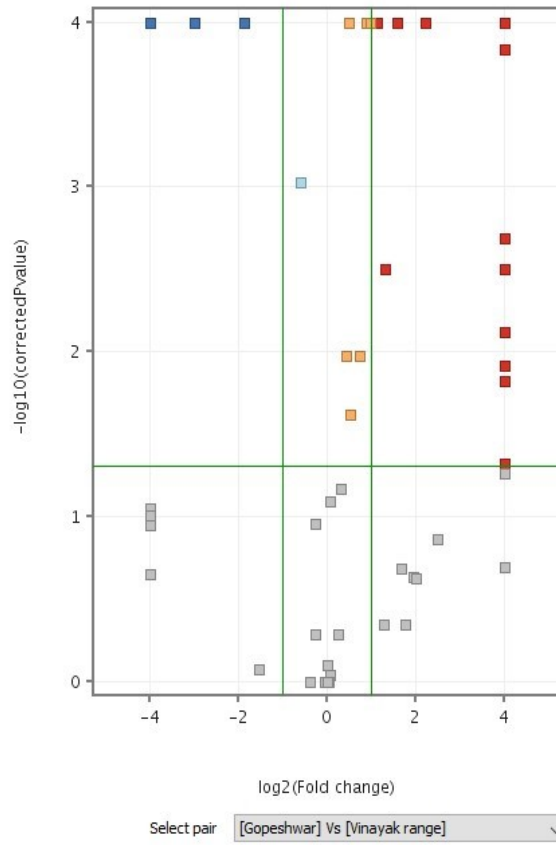

**Figure 31SI: Volcano plot of Gopeshwar v/s Tuneta** **Figure 32SI: Volcano plot of Gopeshwar v/s Vinayak**

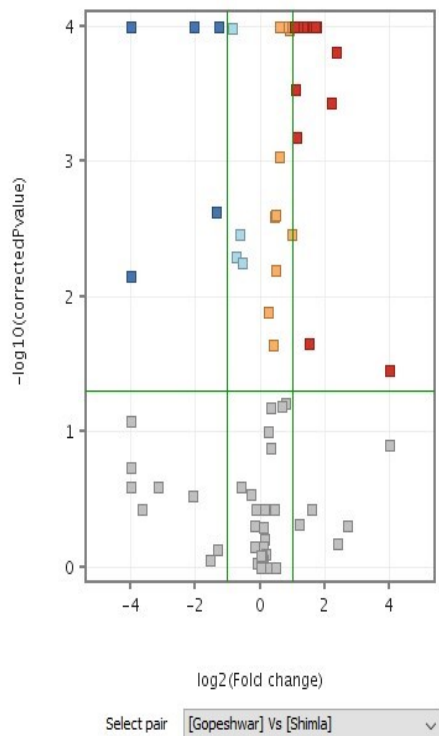

**Figure 33SI: Volcano plot of Gopeshwar v/s Shimla**

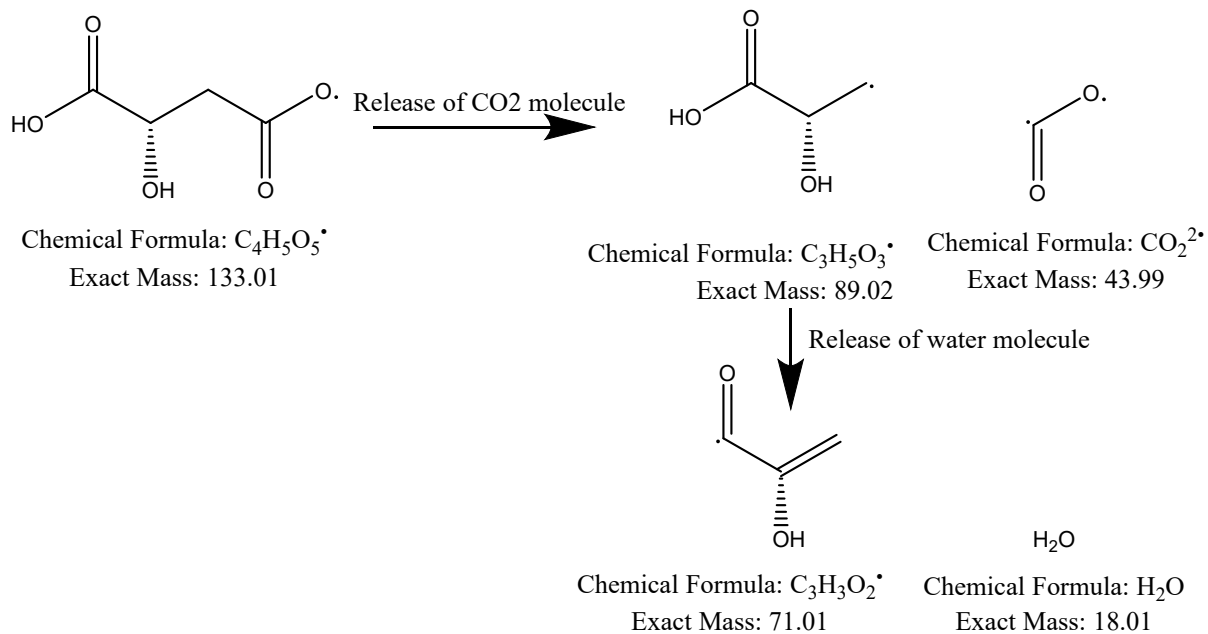

**Figure 34SI: Fragmentation pathway of Malic acid**

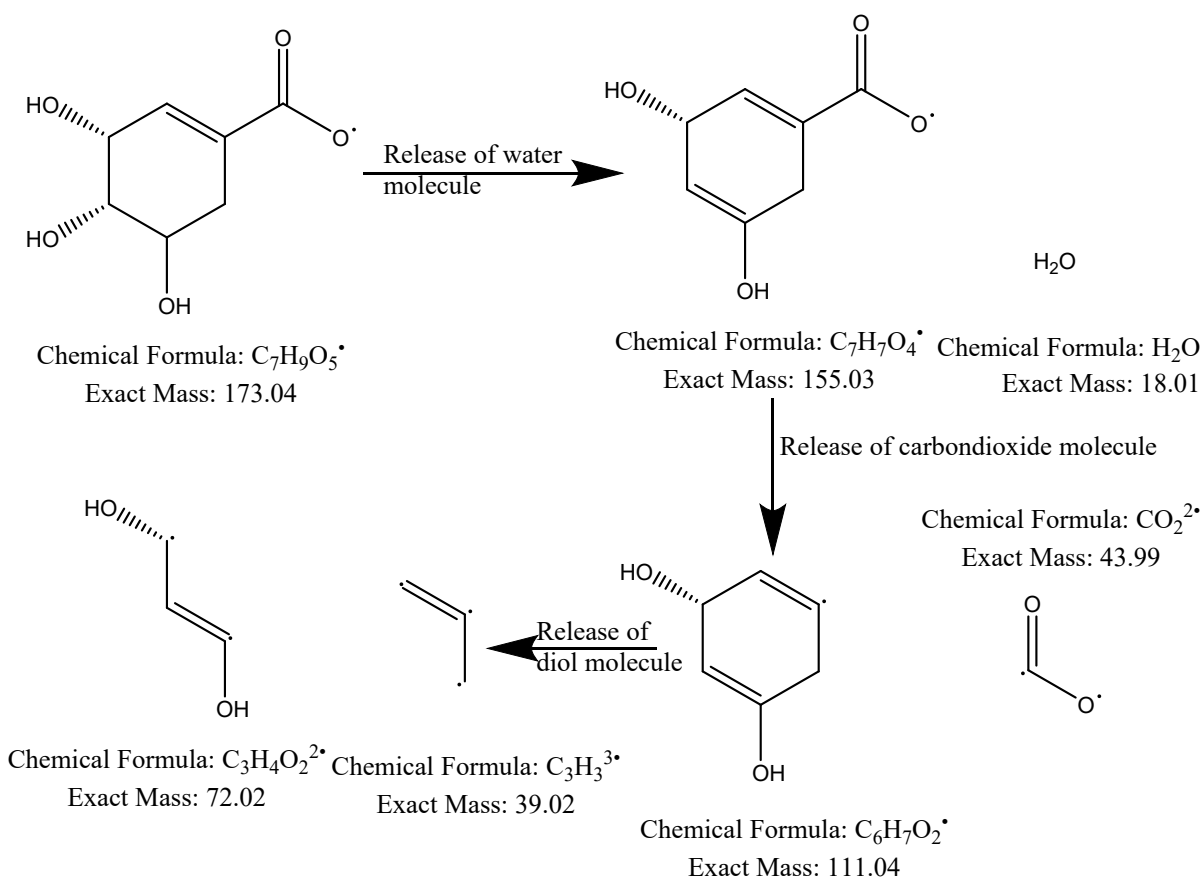

**Figure 35SI: Fragmentation pathway of Shikimic acid**

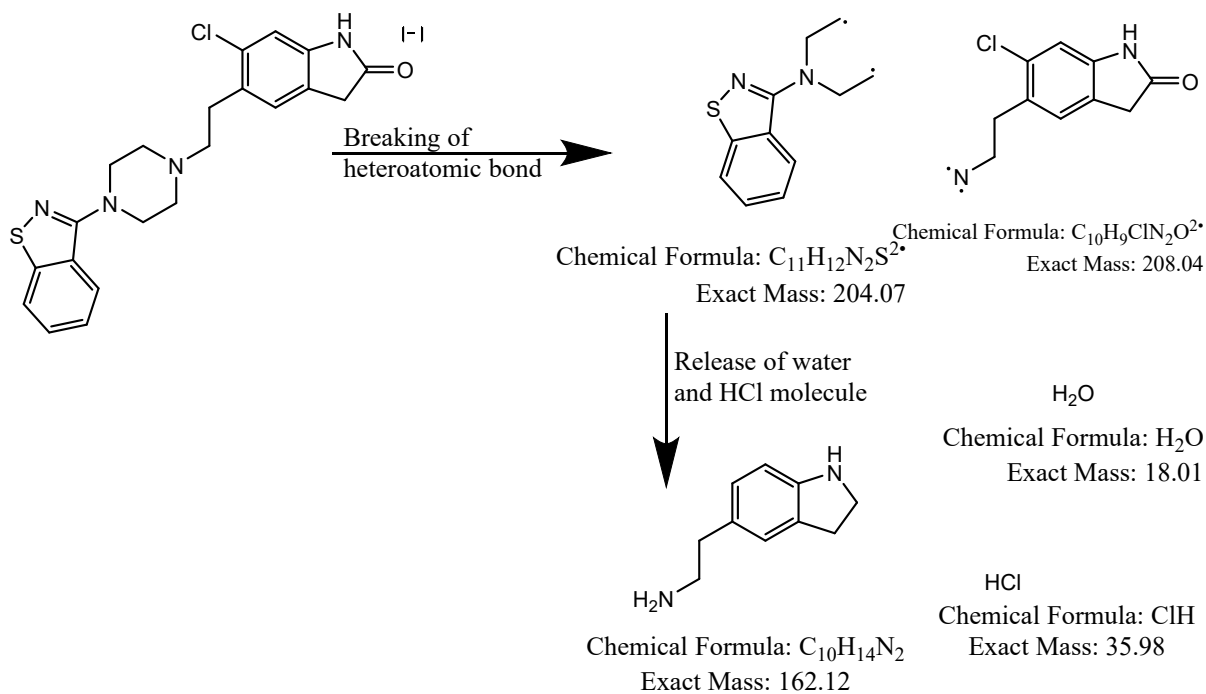

**Figure 36SI: Fragmentation pathway of Ziprasidone**

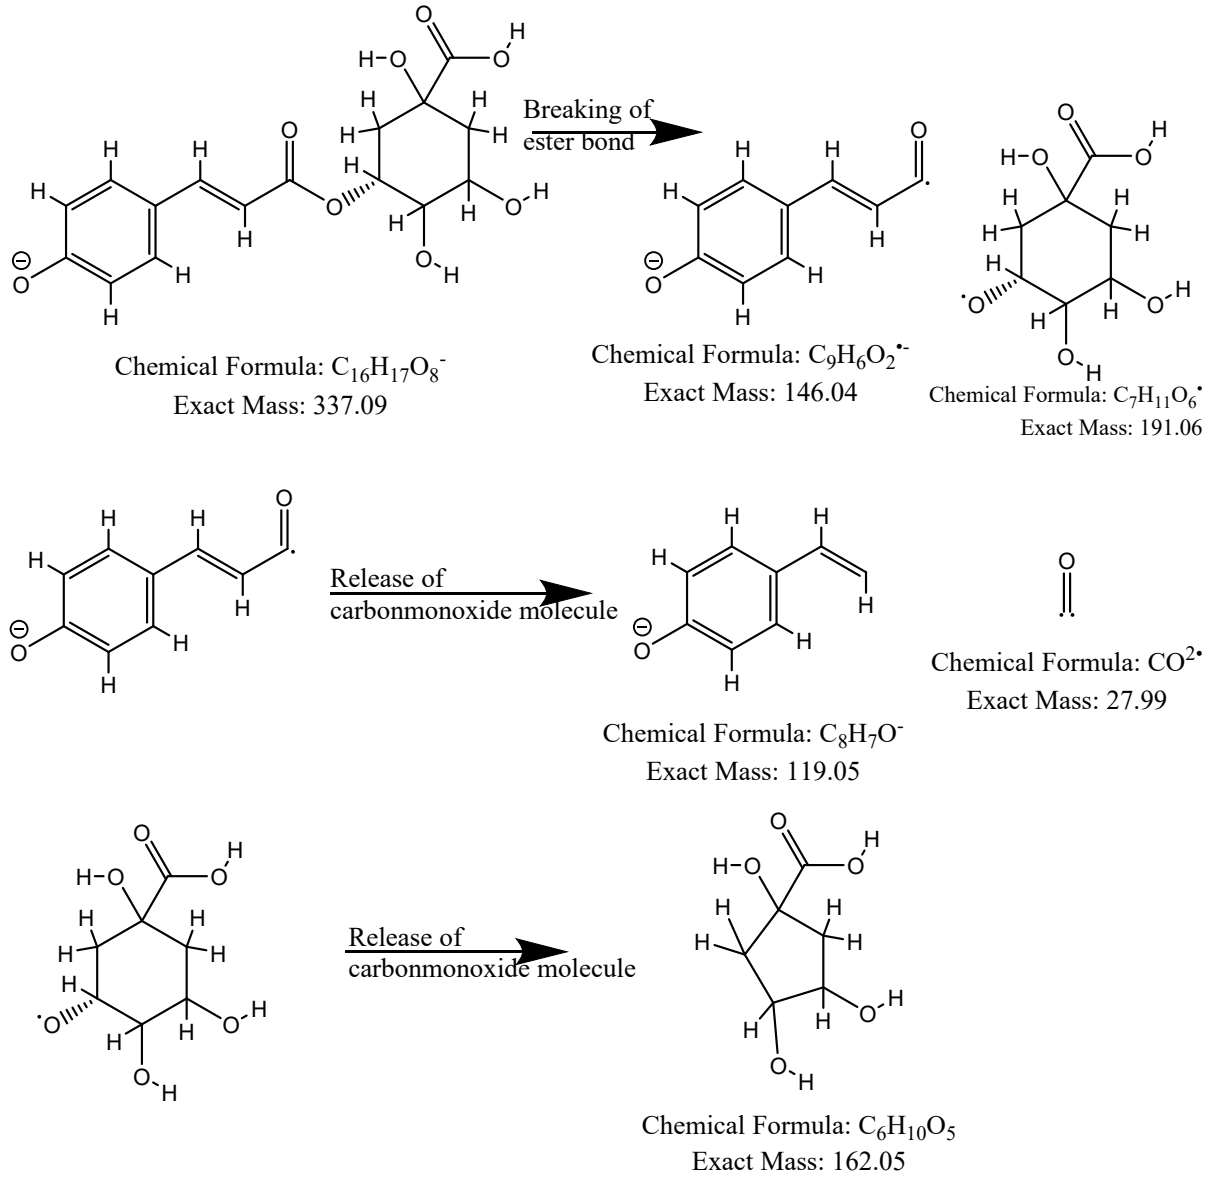

**Figure 37SI: Fragmentation pathway of p-Coumaroyl quinic acid**

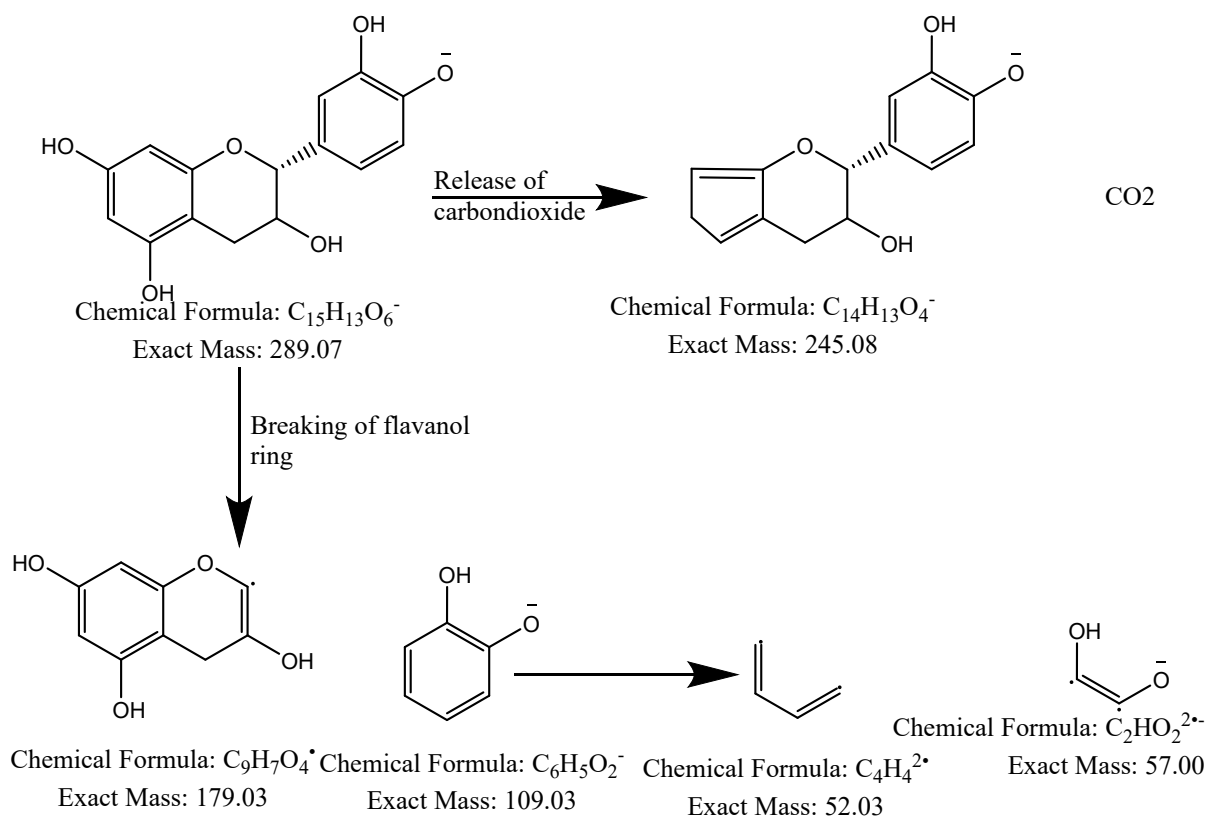

**Figure 38SI: Fragmentation pathway of Catechin**



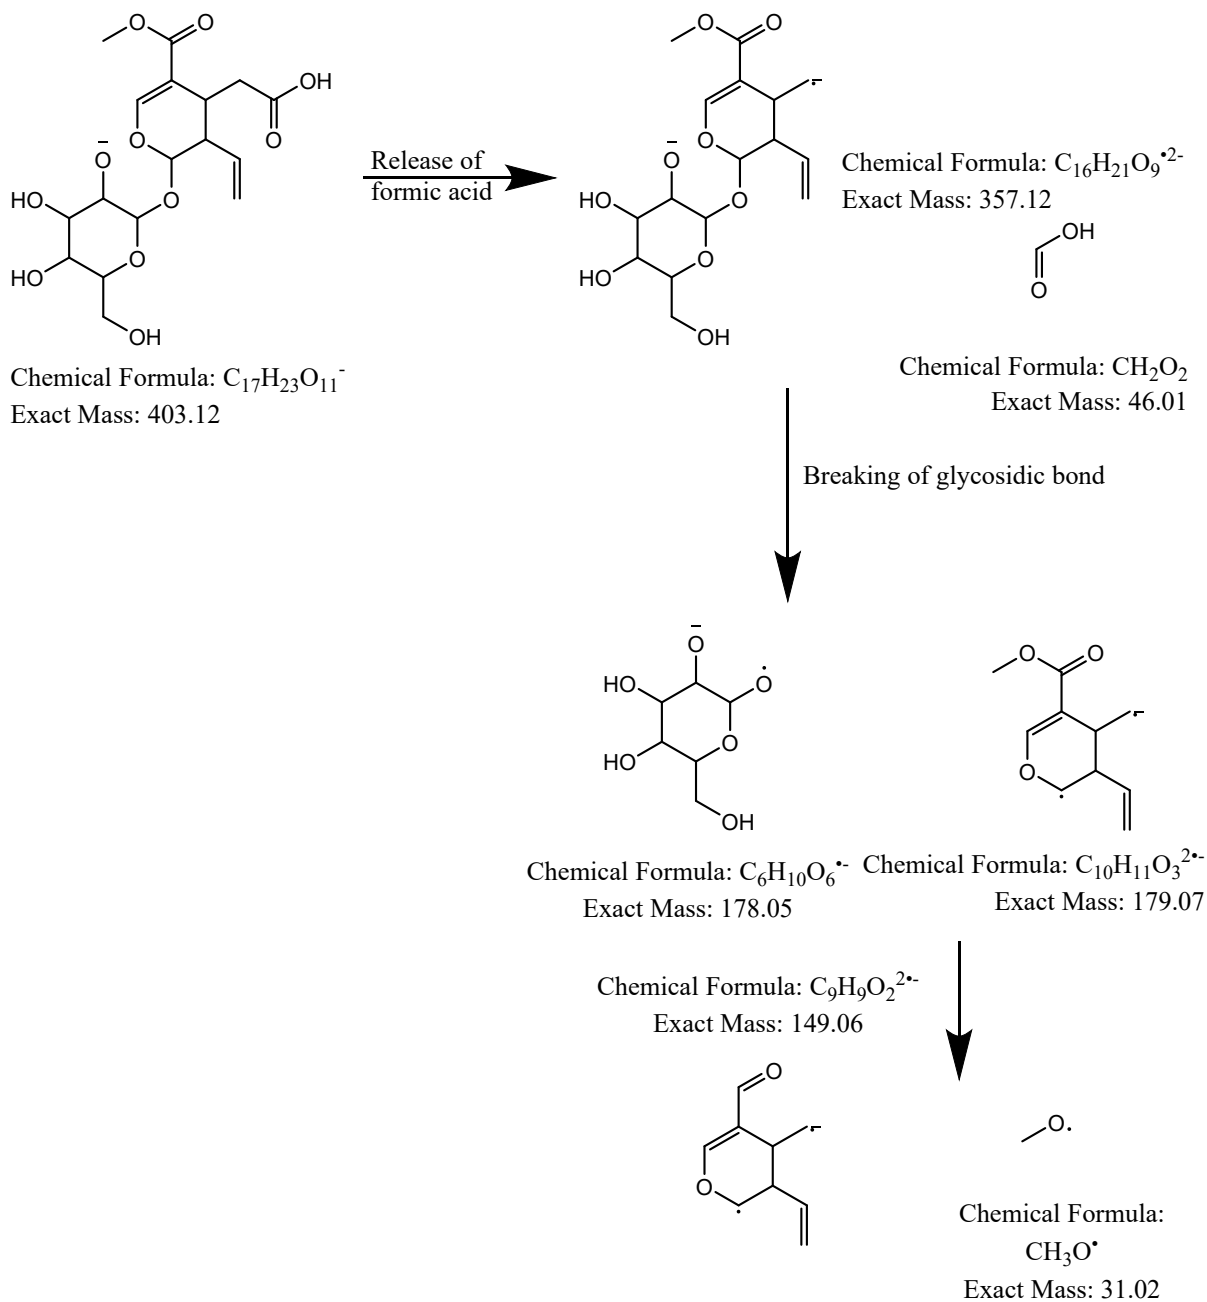

**Figure 39SI: Fragmentation pattern of Secoxyloganin**

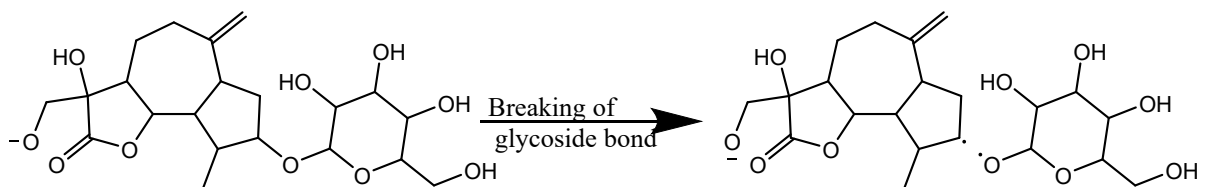

Chemical Formula:  $C_{15}H_{20}O_4^{\cdot-}$

Exact Mass: 264.14

Chemical Formula:  $C_6H_{11}O_6^{\cdot}$

Exact Mass: 179.06

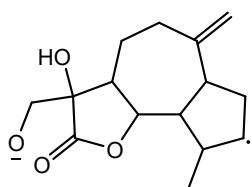

Release of volatile molecule

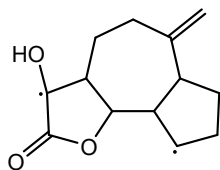

Chemical Formula:  $C_{13}H_{15}O_3^{3\cdot}$

Exact Mass: 219.10

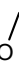

$CH_4$   
Chemical Formula:  $CH_4$   
Exact Mass: 16.03

Chemical Formula:  $CH_2O^{\cdot-}$   
Exact Mass: 30.01

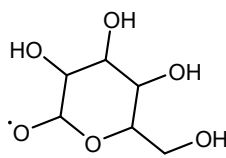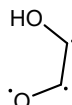

Chemical Formula:  $C_2H_3O_2^{3\cdot}$   
Exact Mass: 59.01

Chemical Formula:  $C_4H_8O_4^{2\cdot}$   
Exact Mass: 120.04

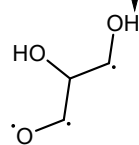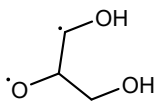

Chemical Formula:  $C_3H_5O_3^{3\cdot}$   
Exact Mass: 89.02

Chemical Formula:  $C_3H_6O_3^{2\cdot}$   
Exact Mass: 90.03

**Figure 40SI: Fragmentation pathway of Cynaroside A**

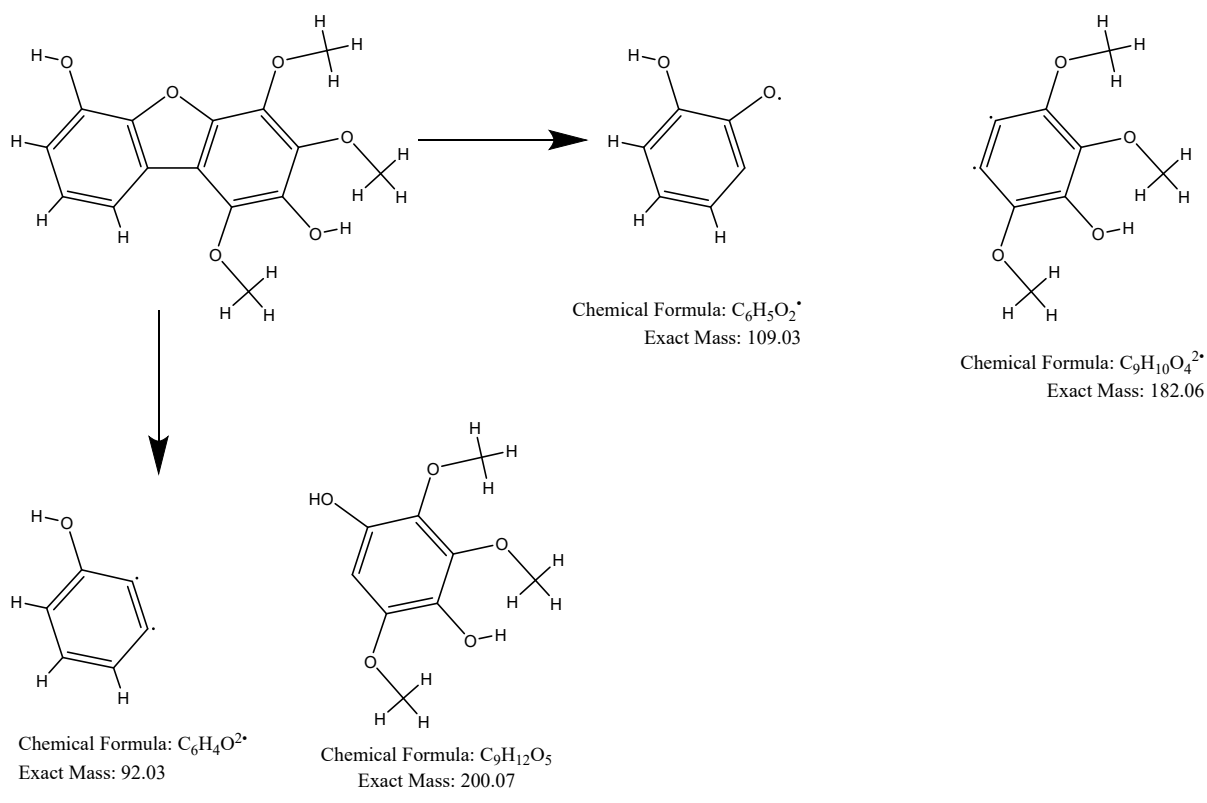

**Figure 41SI: Fragmentation pathway of 6-Hydroxy-alpha-pyrufuran**

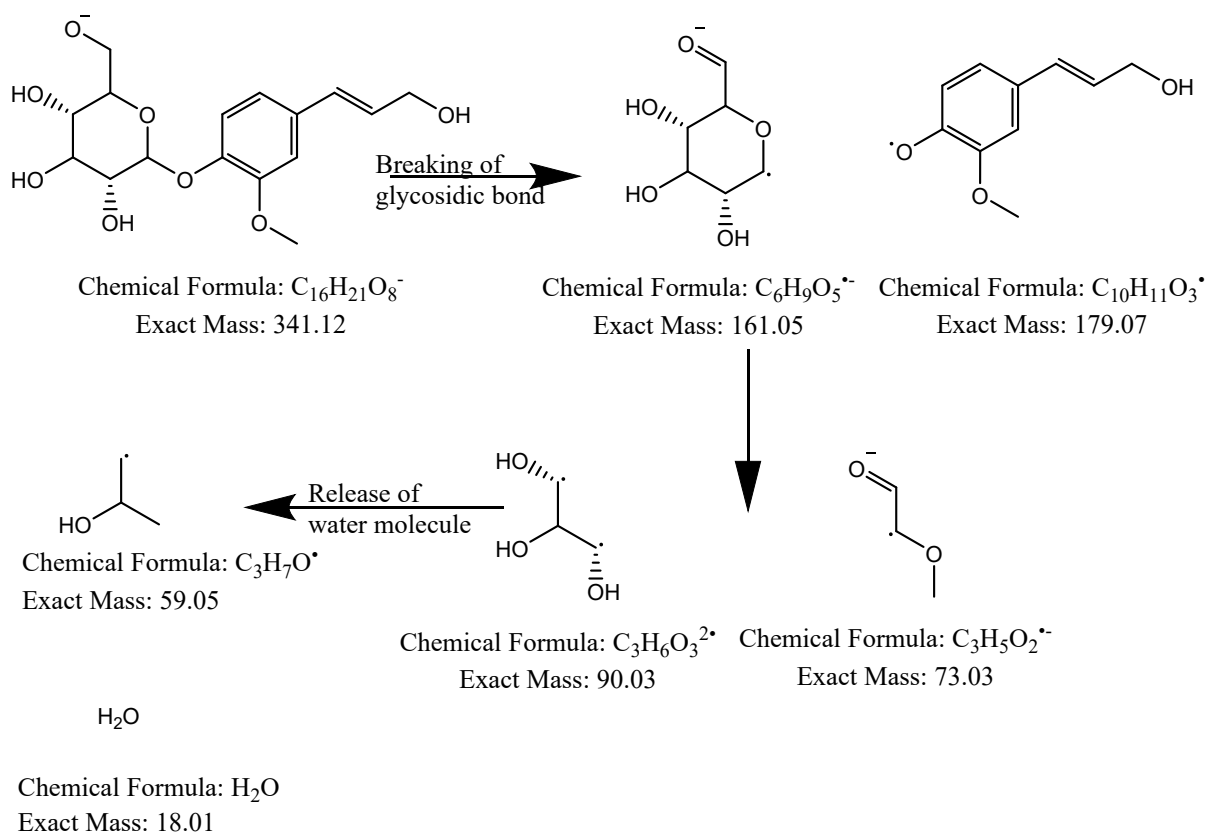

**Figure 42SI: Fragmentation pathway of Coniferin**

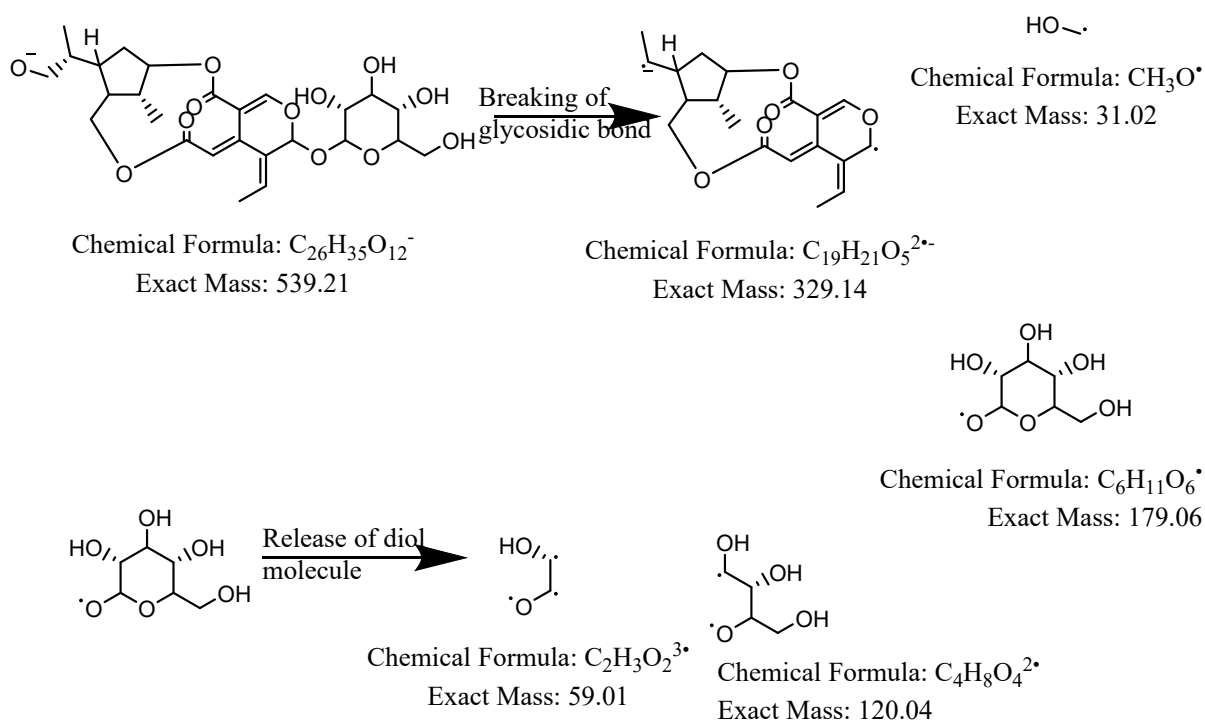

**Figure 43SI: Fragmentation pathway of Sambacin**

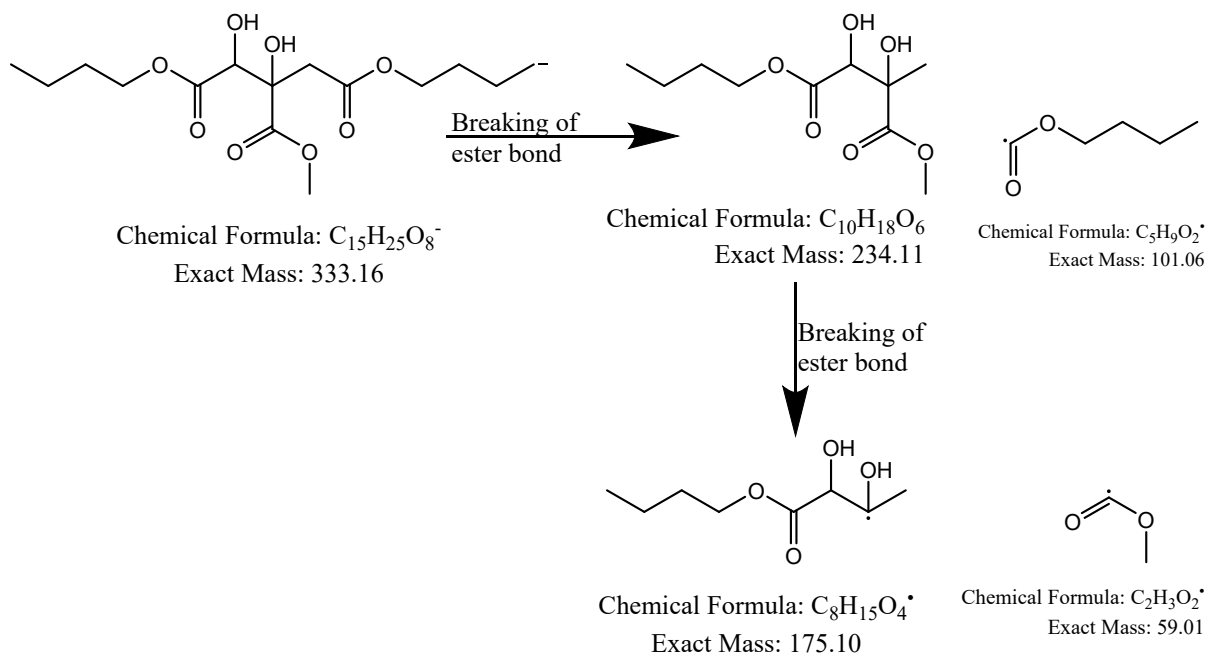

**Figure 44SI: Fragmentation pathway of 1,5-Dibutyl methyl hydroxy citrate**

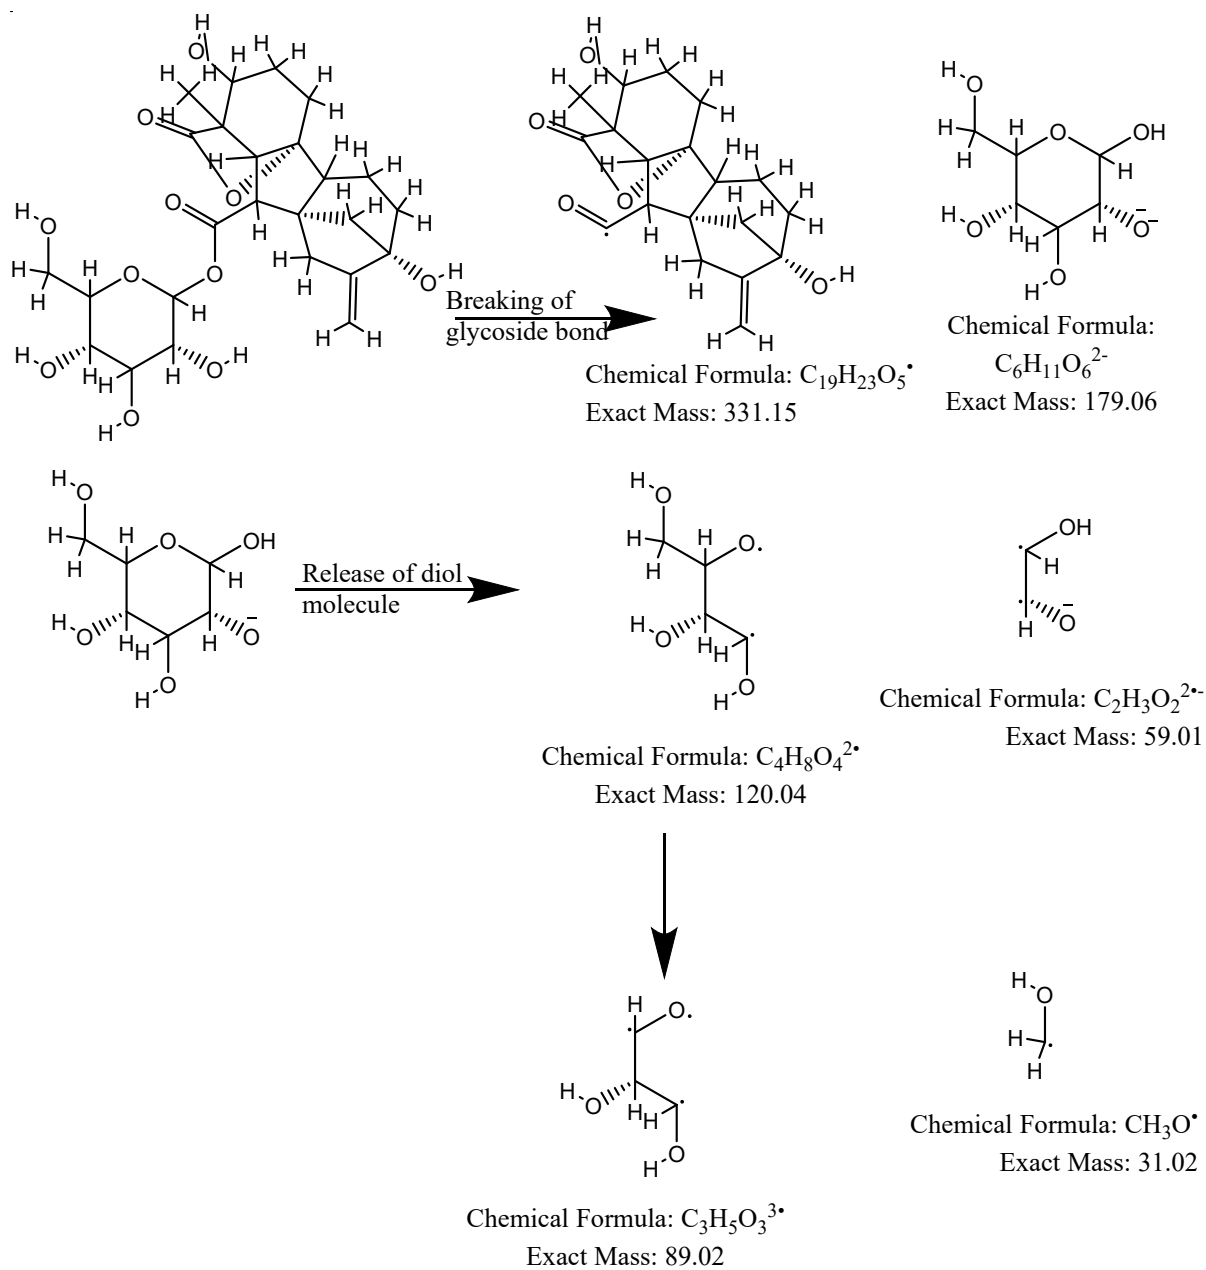

**Figure 45SI: Fragmentation pathway of Gibberellin A1 glucosyl ester**

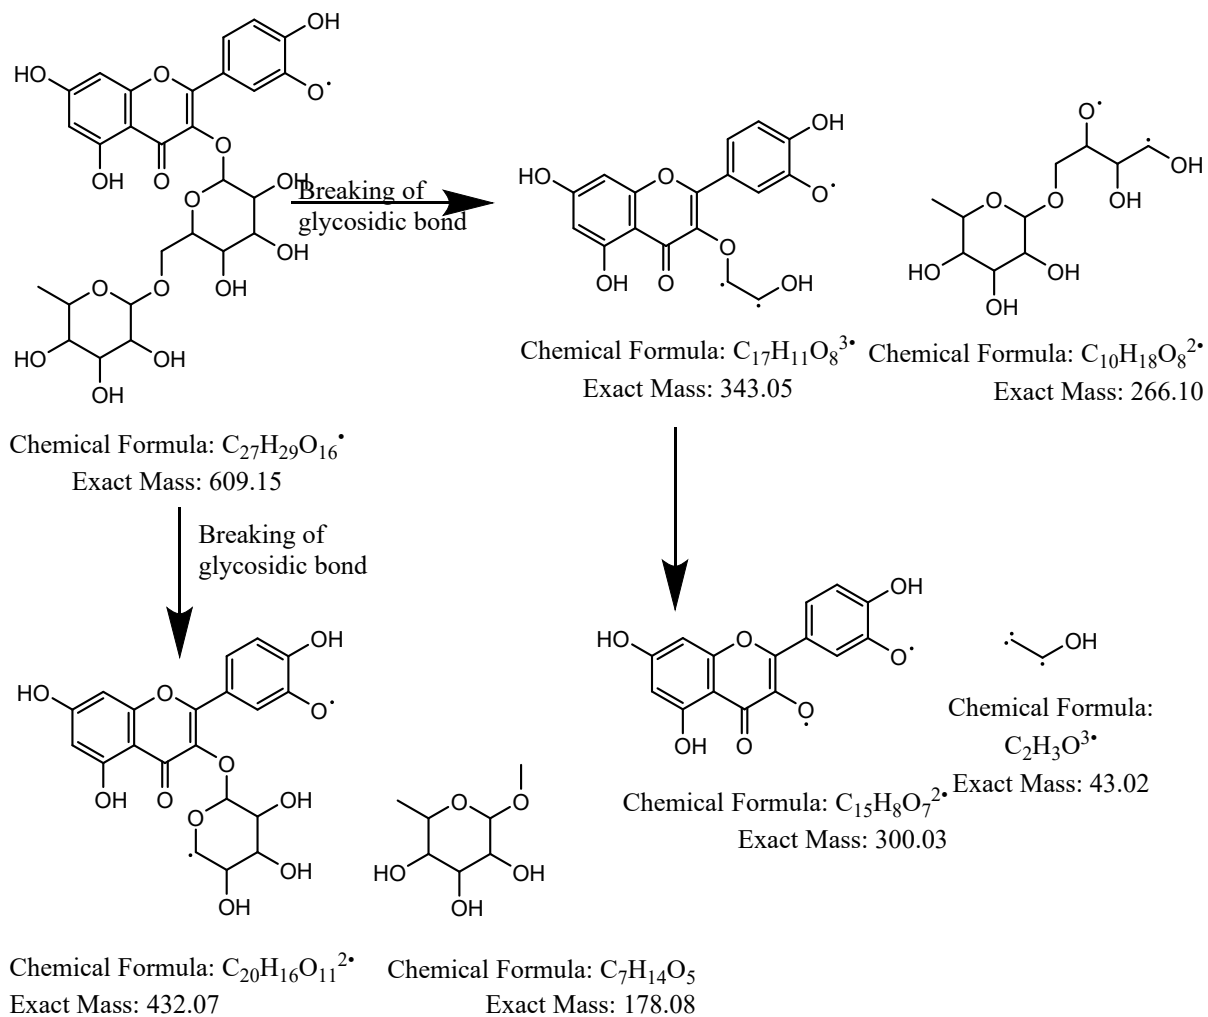

**Figure 46SI: Fragmentation pathway of Rutin**

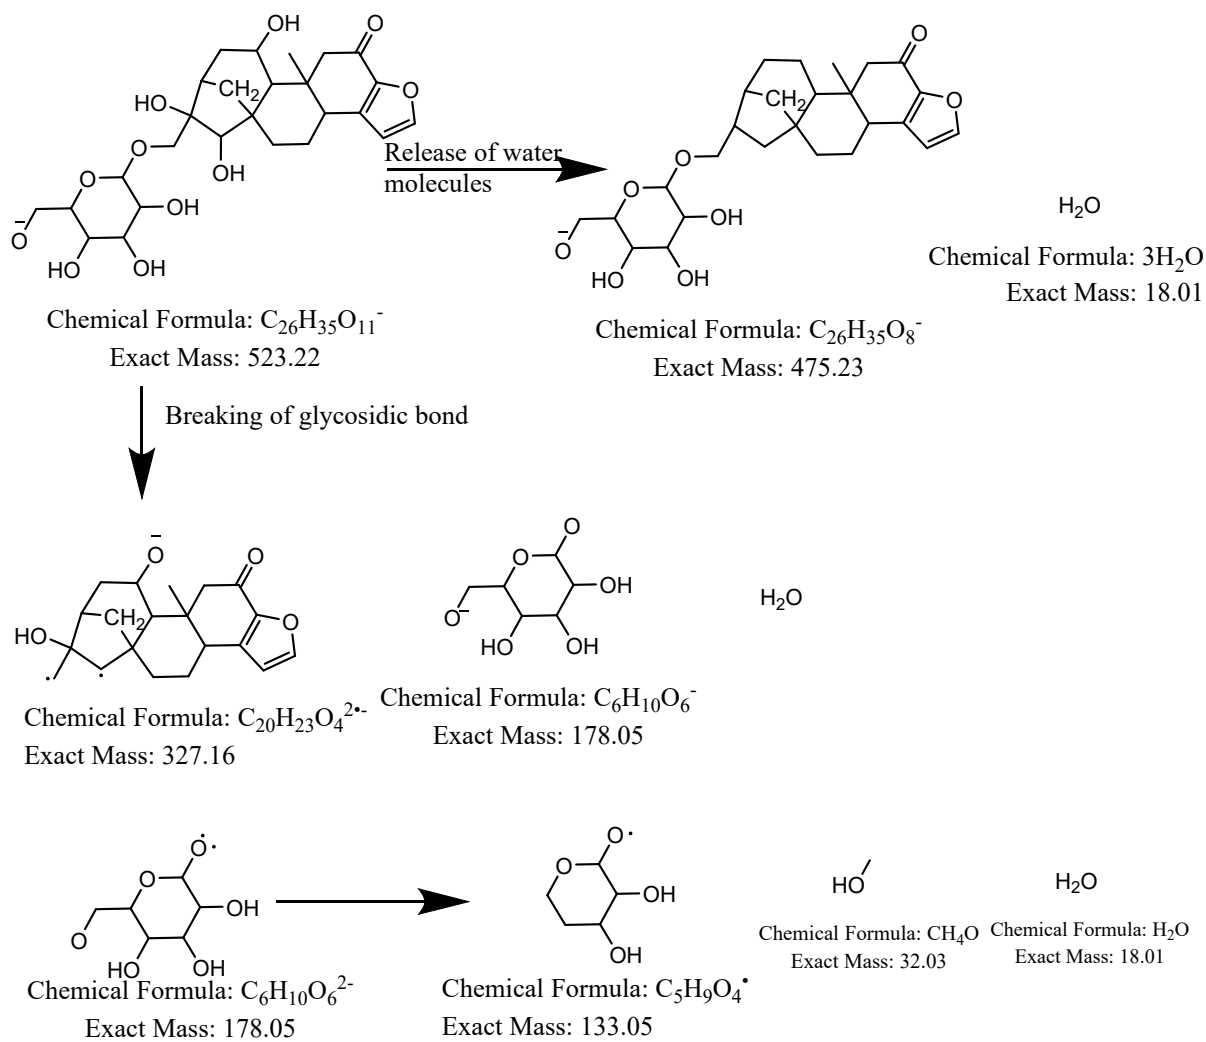

**Figure 47SI: Fragmentation pathway of Mascaroside**



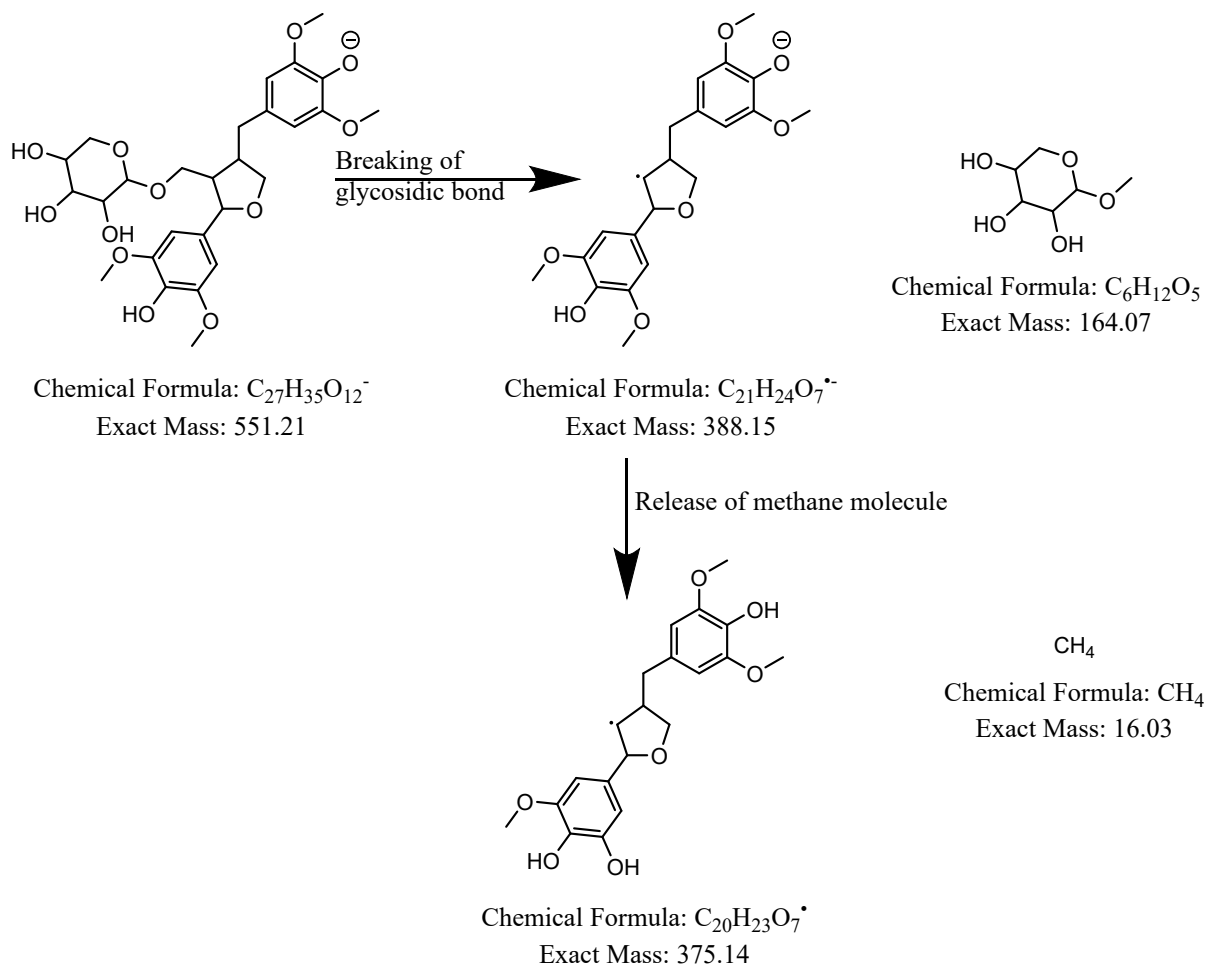

**Figure 48SI: Fragmentation pathway of Prupaside**

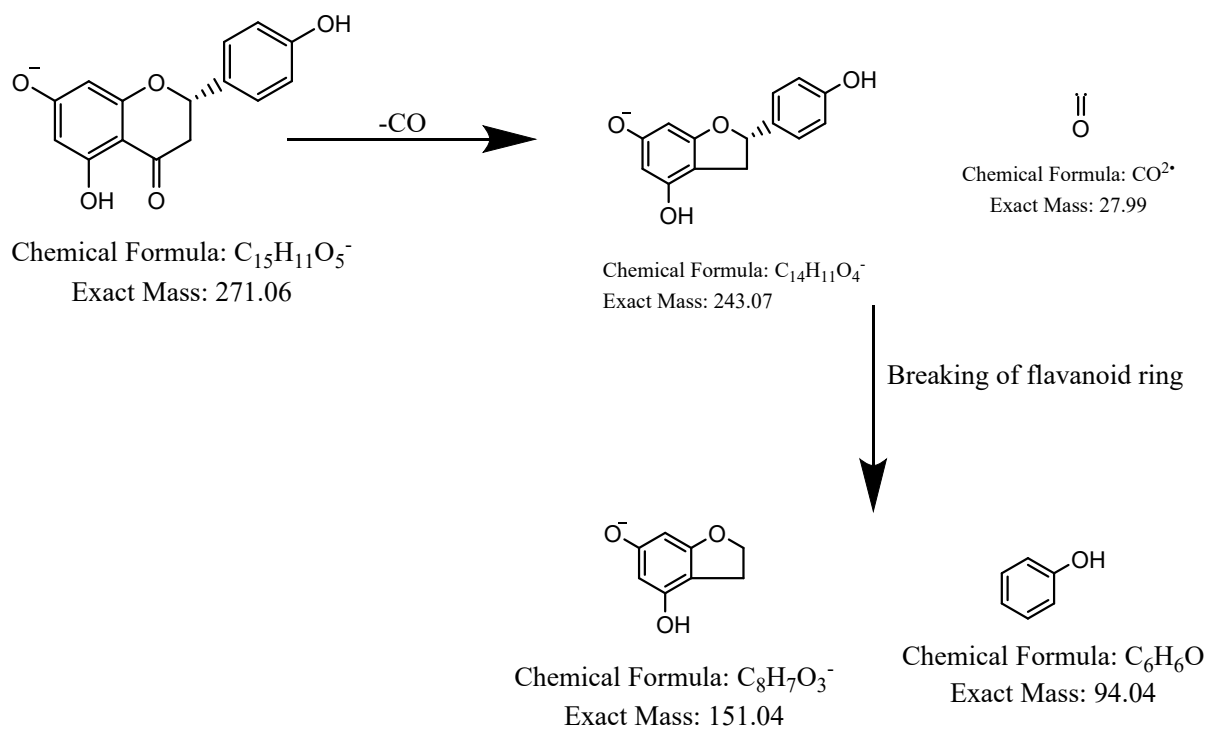

**Figure 49SI: Fragmentation pathway of Naringenin**

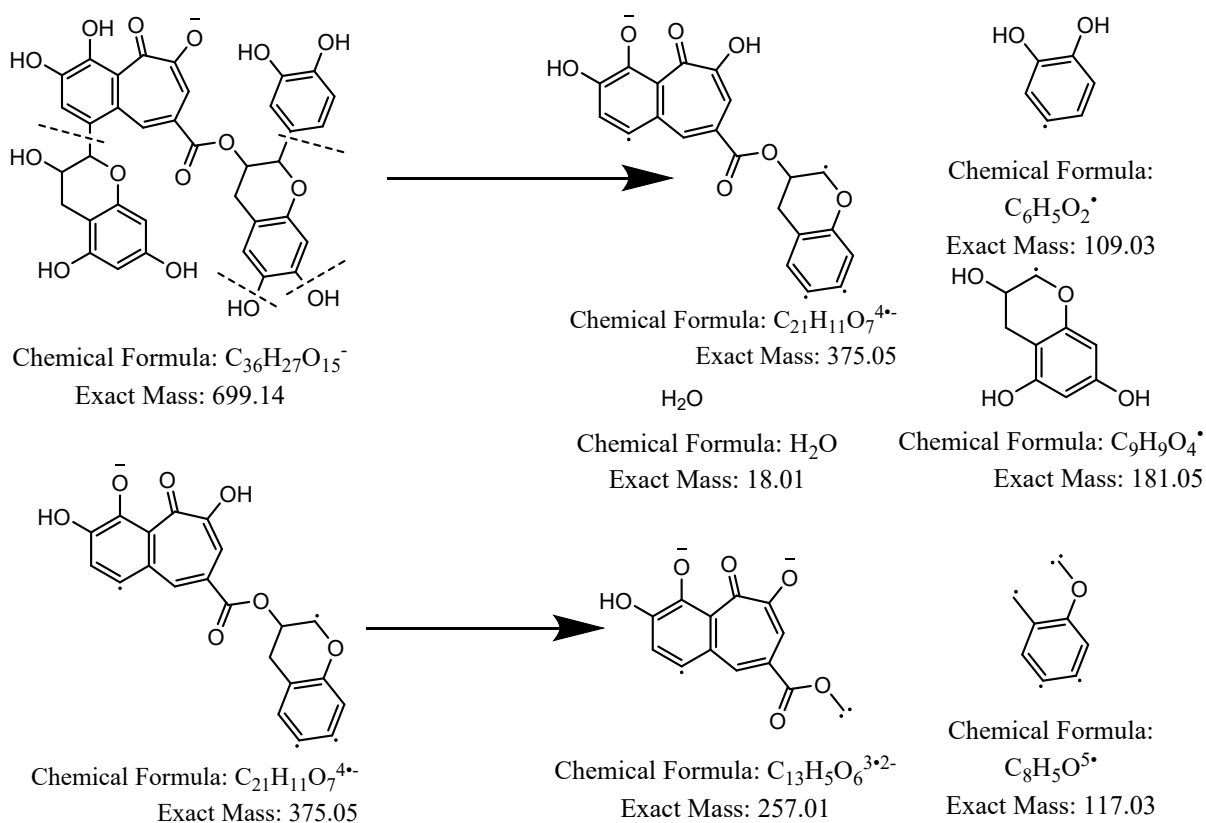

**Figure 50SI: Fragmentation pathway of Theaflavate B**

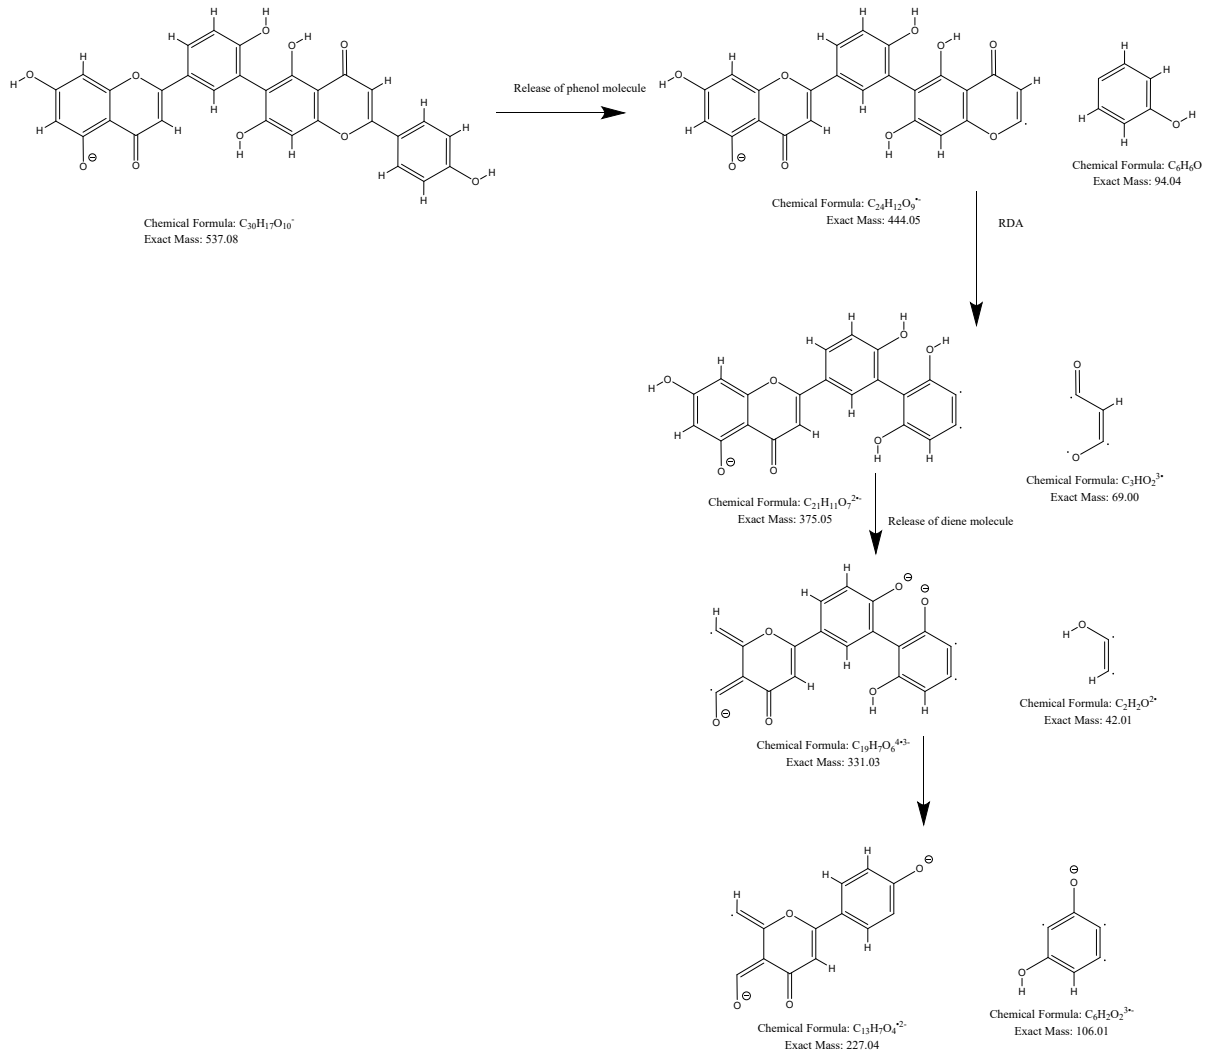

**Figure 51SI: Fragmentation pathway of Robustaflavone**

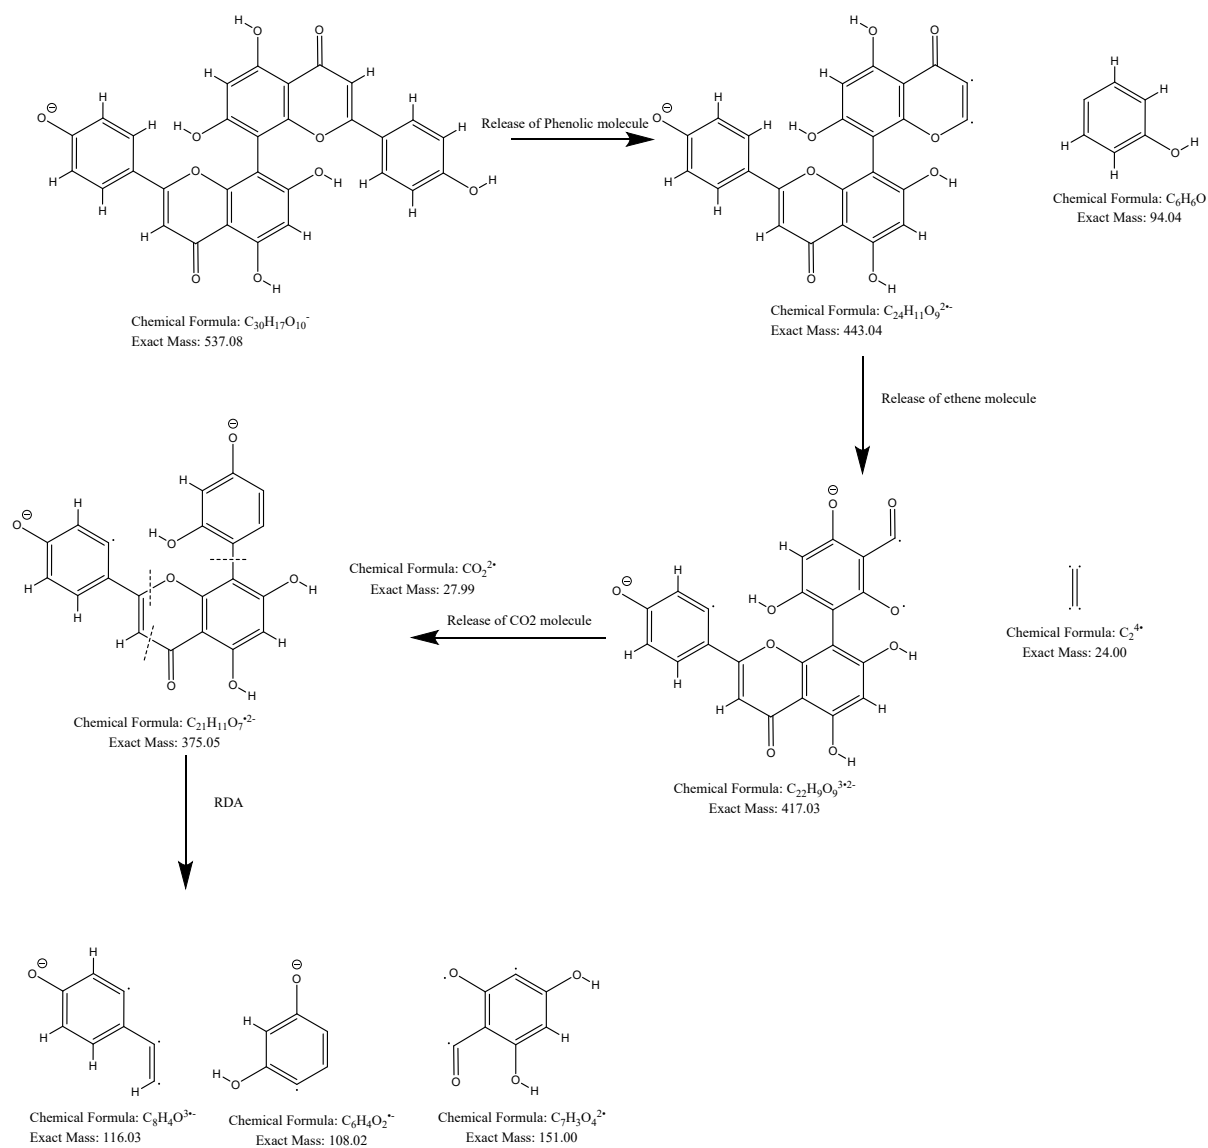

**Figure 52SI: Fragmentation pathway of Cupressuflavone**

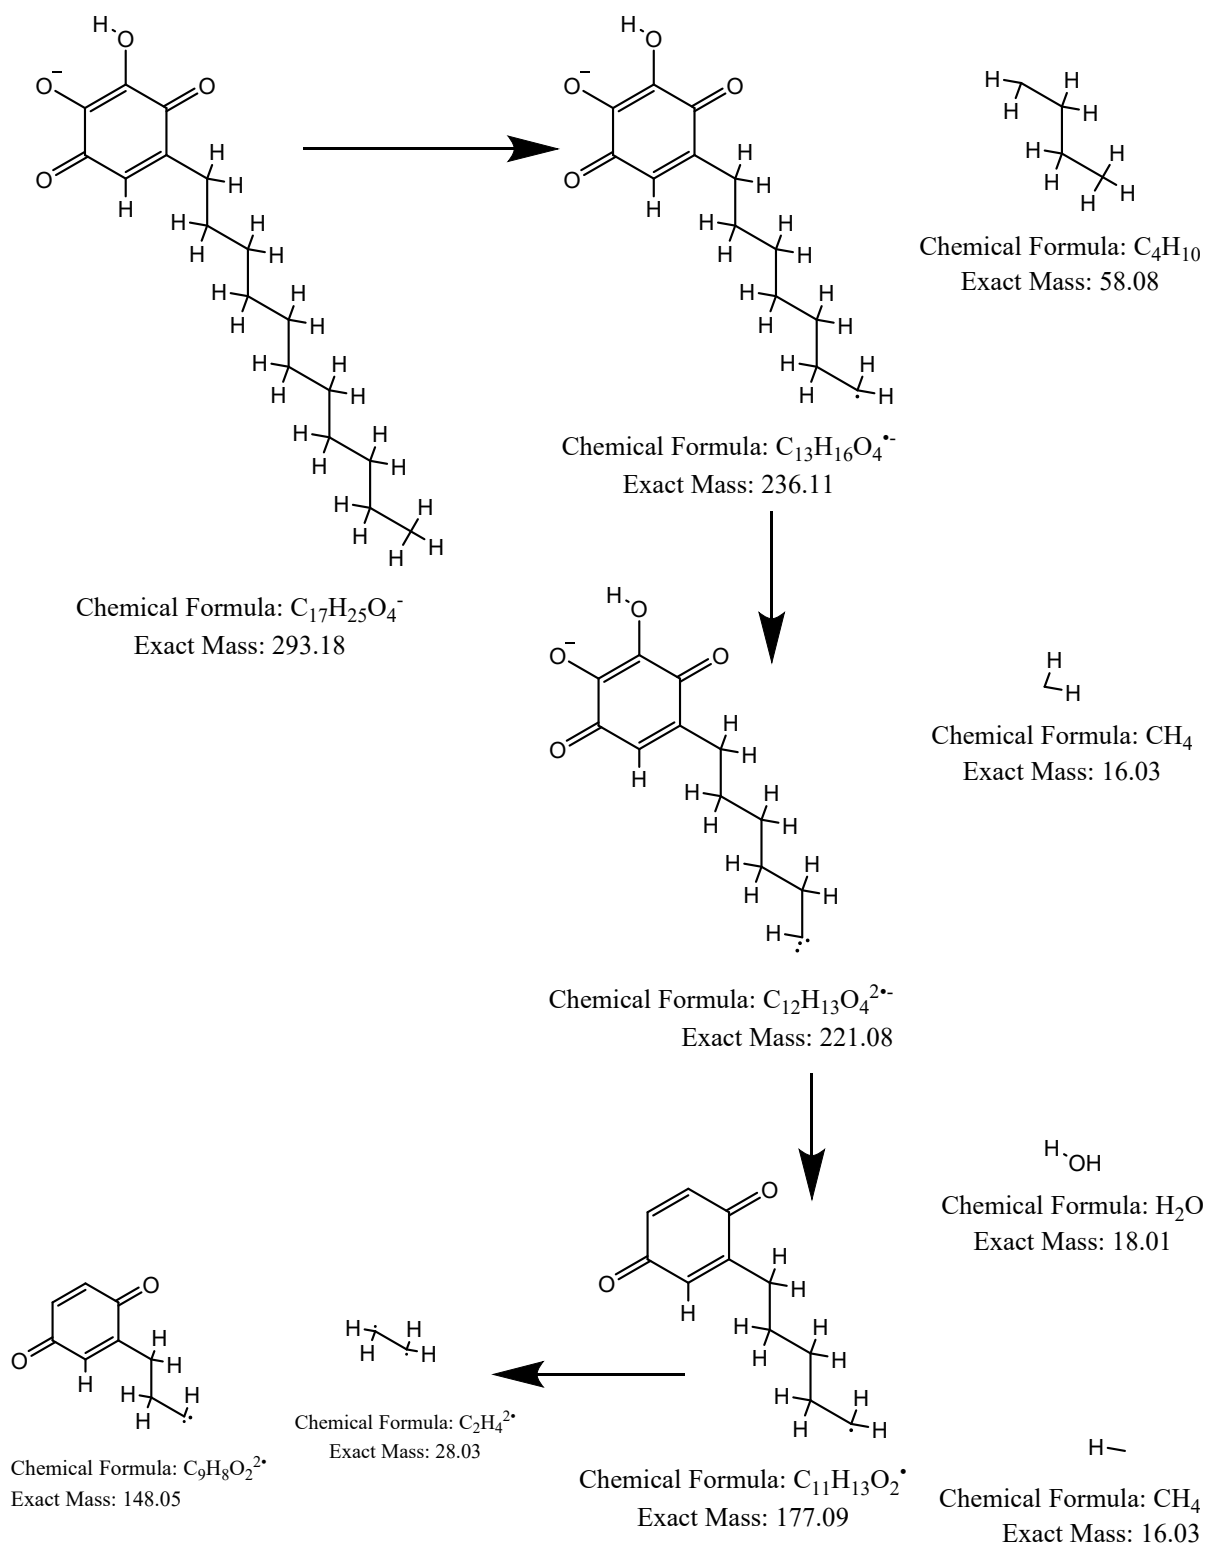

**Figure 53SI: Fragmentation pathway of Myrsinone**

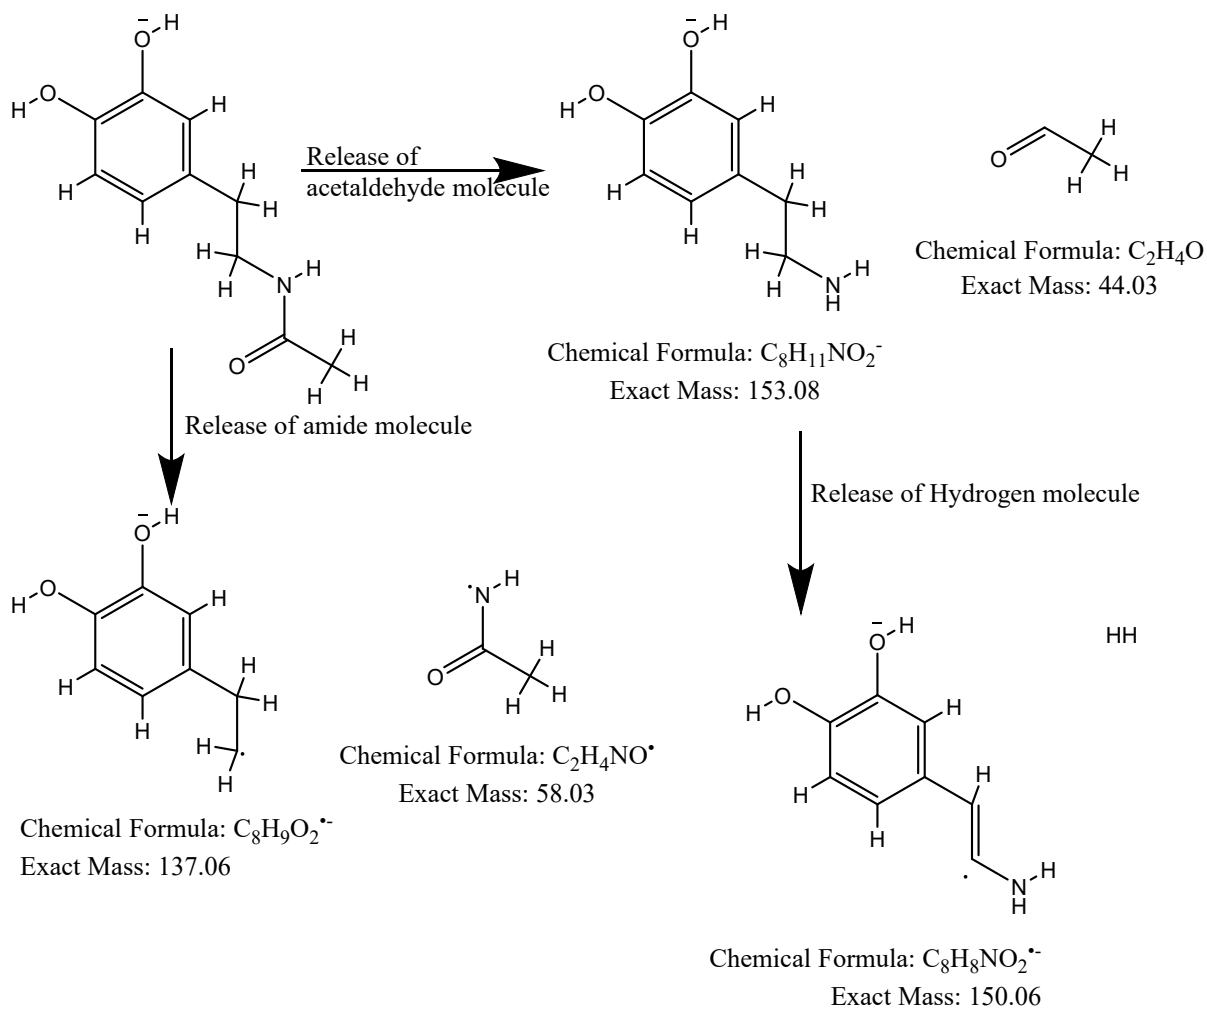

**Figure 54SI: Fragmentation pathway of n-acetyldopamine**

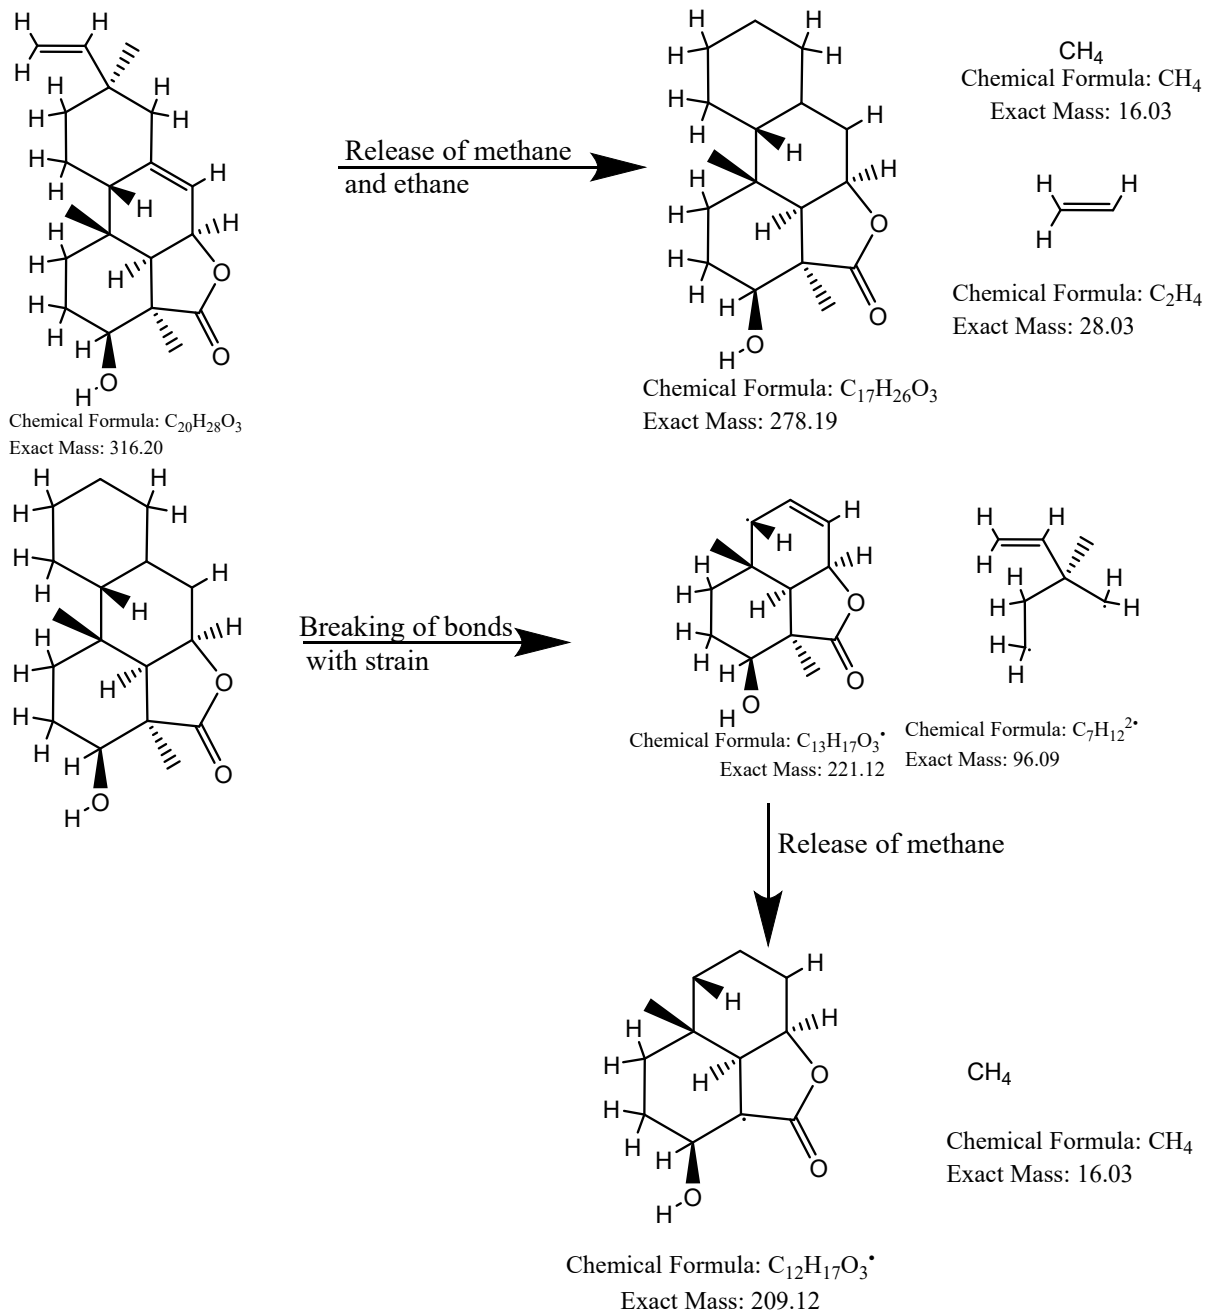

**Figure 55SI: Fragmentation pathway of 3-beta-hydroxy-9-beta-primara-7,15-diene-19,6 beta-o-lide**

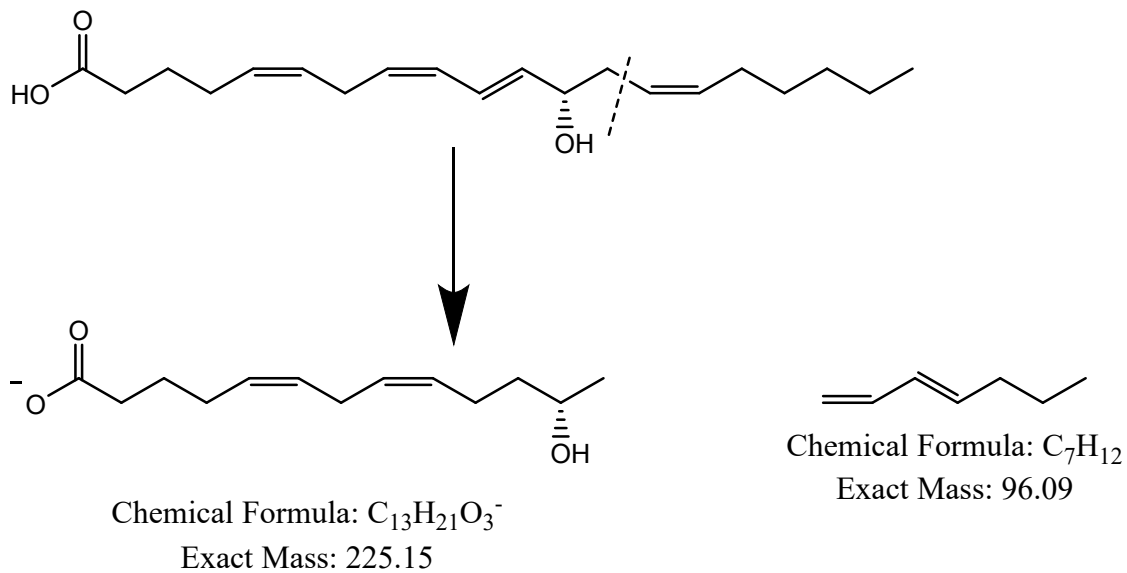

**Figure 56SI: Fragmentation pattern of (±)12-Hydroxy-5,8,10,14-eicosatetraenoic acid**

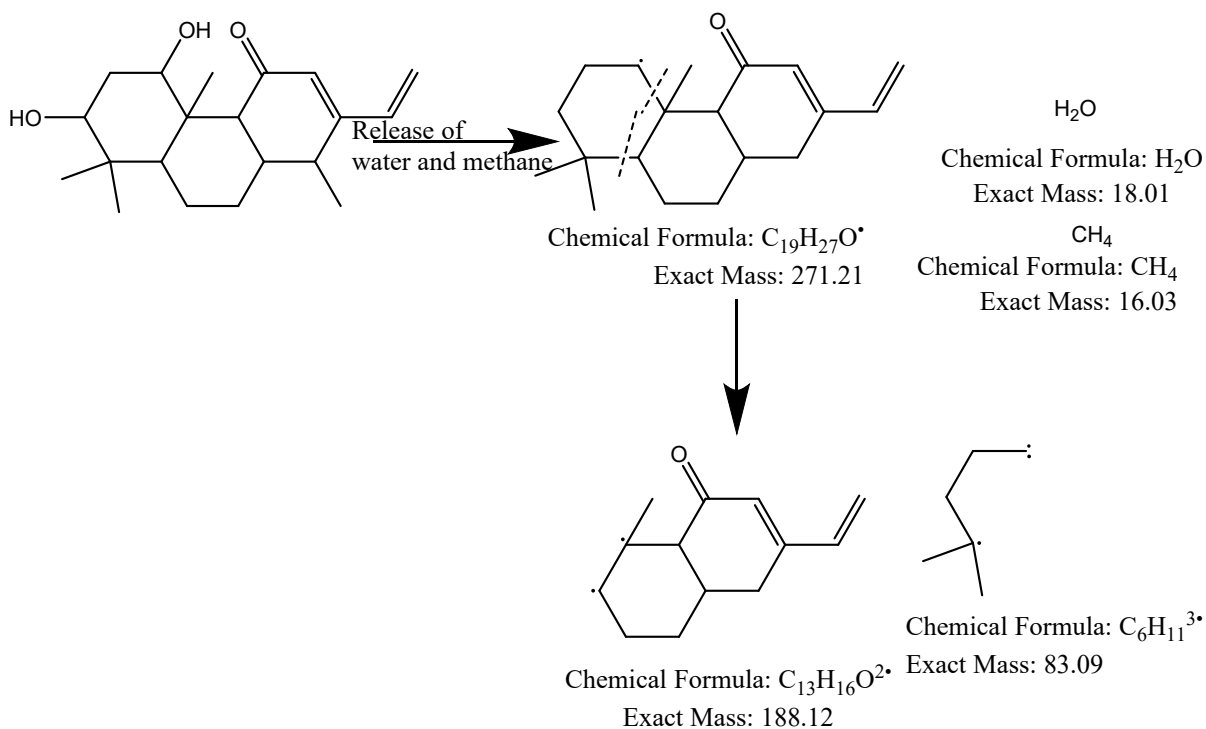

**Figure 57SI: Fragmentation pathway of Phytocassane C**



**Table 1SI: *Cupressus torulosa* locations and their geographical coordinates**

| <b>S.No</b> | <b>Location</b>                  | <b>Latitude</b> | <b>Longitude</b> | <b>Altitude<br/>(meter)</b> |
|-------------|----------------------------------|-----------------|------------------|-----------------------------|
| 1           | Suwakholi                        | 78°10'21.06" E  | 30°26'43.58" N   | 2145                        |
| 2           | Tuneta                           | 78°11'37.01" E  | 30°26'41.29" N   | 2350                        |
| 3           | Chakrata                         | 77°51'51" E     | 30°44'20" N      | 2560                        |
| 4           | Shimla                           | 77°18'56" E     | 31°11'53" N      | 2172                        |
| 5           | Chirbatya                        | 78°50'18.32" E  | 30°22'40.12" N   | 2259                        |
| 6           | Gopeshwar                        | 79°19'07.44" E  | 30°25'00.12" N   | 1648                        |
| 7           | Dungar                           | 79°06'17.22" E  | 30°29'56.76" N   | 1502                        |
| 8           | Bhatwari                         | 78°34'59" E     | 30°45'49" N      | 1418                        |
| 9           | Jhala                            | 78°43'50" E     | 31°1'48" N       | 2487                        |
| 10          | FRI Dehradun                     | 78°0'4.3" E     | 30°20'30.4" N    | 693                         |
| 11          | Shingali (nearOogla)             | 80°18'26.9" E   | 29°44'1.2" N     | 1561                        |
| 12          | Munsyari                         | 80°13'50.9" E   | 30°3'48.3" N     | 2408 m                      |
| 13          | Kanda (Bageshwar)                | 79°53'2.2" E    | 29°49'43.1" N    | 1753 m                      |
| 14          | Vinayak (Nainarange)<br>Nainital | 79°24'51.9" E   | 29°27'18.9" N    | 2193 m                      |

**Table 2SI: Compounds identified in 25% aqueous methanol extracts of needles of *Cupressus torulosa* across 14 different geographical locations**

| S. No | RT    | Compound name  | Molecular formula                                                 | [M-H] <sup>-</sup> m/z | Observed mass | Reference mass | Mass fragments                        | Identification score | Class of compound          | Molecular Structure                                                                   |
|-------|-------|----------------|-------------------------------------------------------------------|------------------------|---------------|----------------|---------------------------------------|----------------------|----------------------------|---------------------------------------------------------------------------------------|
| 1     | 0.802 | Malic acid*    | C <sub>4</sub> H <sub>6</sub> O <sub>5</sub>                      | 133.0142               | 134.0208      | 134.0209       | 115.034, 89.0245, 71.0133             | 98.88                | Dicarboxylic acid          | 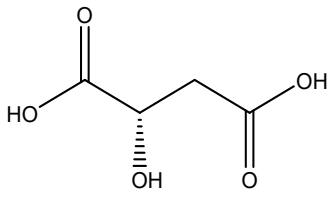   |
| 2     | 0.819 | Shikimic acid* | C <sub>7</sub> H <sub>10</sub> O <sub>5</sub>                     | 173.0455               | 174.0519      | 174.0528       | 155.0353, 111.0443, 72.9934           | 94.57                | Cyclohexanecarboxylic acid |    |
| 3     | 0.850 | Hovenitin I    | C <sub>16</sub> H <sub>14</sub> O <sub>8</sub>                    | 334.0689               | 334.0689      | 334.0685       | 217.0511, 173.0445, 159.0091, 71.0136 | 95.65                | Flavanol (Catechin)        |   |
| 4     | 2.873 | Ziprasidone*   | C <sub>21</sub> H <sub>21</sub> ClN <sub>4</sub> O <sub>5</sub> S | 411.1063               | 412.1135      | 412.11245      | 411.1059, 208.9613, 162.9549          | 97.20                | Heterocyclic compound      |  |

|   |           |                                                                  |                      |              |              |              |                                                                                                                   |       |                                     |                                                                                       |
|---|-----------|------------------------------------------------------------------|----------------------|--------------|--------------|--------------|-------------------------------------------------------------------------------------------------------------------|-------|-------------------------------------|---------------------------------------------------------------------------------------|
| 5 | 3.2<br>19 | Galloca<br>techin                                                | $C_{15}H_{14}O_7$    | 305.<br>0666 | 306.0<br>739 | 306.0<br>739 | 125.0<br>244,<br>179.0<br>351,<br>261.0<br>766,<br>305.0<br>666,<br>83.01<br>38,<br>167.0<br>350,<br>219.0<br>666 | 92.81 | Flavano<br>l                        | 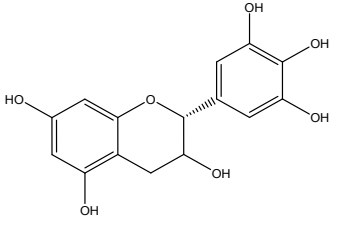   |
| 6 | 3.2<br>74 | Methyl<br>6-O-<br>galloyl-<br>beta-D-<br>glucopy<br>ranosid<br>e | $C_{14}H_{18}O_{10}$ | 345.<br>0825 | 346.0<br>903 | 346.0<br>899 | 59.01<br>37,<br>345.0<br>825,<br>285.8<br>515                                                                     | 98.57 | Phenoli<br>c Ester                  |   |
| 7 | 3.2<br>87 | Epigall<br>ocatech<br>in                                         | $C_{15}H_{14}O_7$    | 305.<br>0667 | 306.0<br>720 | 306.0<br>721 | 261.0<br>754,<br>179.0<br>341,<br>125.0<br>256,<br>77.03<br>75                                                    | 95.63 | Flavon<br>oid<br>(Catech<br>in)     |  |
| 8 | 3.8<br>03 | 3,4-<br>Dihydr<br>oxyben<br>zoic<br>acid                         | $C_7H_6O_4$          | 153.<br>0231 | 154.0<br>257 | 154.0<br>253 | 109.0<br>294,<br>65.00<br>35                                                                                      | 95.66 | Aromat<br>ic<br>carboxy<br>lic acid |  |

|    |                         |                                                                         |                      |              |              |              |                                                                                                    |       |                                               |                                                                                       |
|----|-------------------------|-------------------------------------------------------------------------|----------------------|--------------|--------------|--------------|----------------------------------------------------------------------------------------------------|-------|-----------------------------------------------|---------------------------------------------------------------------------------------|
| 9  | 4.3<br>54               | 7-<br>deoxylo<br>ganate                                                 | $C_{16}H_{24}O_9$    | 359.<br>1345 | 360.1<br>418 | 360.1<br>420 | 89.02<br>43,<br>179.0<br>706<br>59.01<br>39,<br>168.0<br>530<br>359.1<br>345                       | 97.21 | Terpen<br>e<br>(Iridoid<br>glycosi<br>de<br>) | 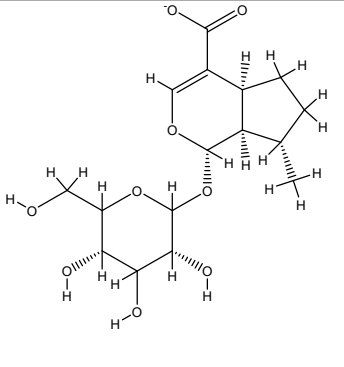   |
| 10 | 4.8<br>27               | 3'-<br>Glucos<br>yl-<br>2',4',6'-<br>trihydro<br>xyaceto<br>phenon<br>e | $C_{14}H_{18}O_9$    | 329.<br>0876 | 330.0<br>949 | 330.0<br>950 | 328.9<br>188,<br>198.9<br>130,<br>59.01<br>35                                                      | 96.44 | Phenoli<br>c<br>glycosi<br>de                 |   |
| 11 | 4.9<br>41               | 3-<br>Methox<br>ysalicyl<br>ic acid                                     | $C_8H_8O_4$          | 167.<br>0349 | 168.0<br>421 | 168.0<br>422 | 167.0<br>349,<br>123.0<br>448,<br>108.0<br>211,<br>65.02<br>20,<br>152.0<br>118                    | 95.45 | Carbox<br>ylic<br>acid                        |  |
| 12 | 5.3<br>12;<br>6.9<br>92 | Procy<br>anidin<br>B5                                                   | $C_{30}H_{26}O_{12}$ | 577.<br>1349 | 578.1<br>422 | 578.1<br>424 | 577.1<br>349,<br>425.0<br>879,<br>451.1<br>041,<br>289.0<br>717,<br>125.0<br>246,<br>245.0<br>816, | 96.54 | Flavon<br>oid<br>(Antho<br>cyanidi<br>n)      |  |

|    |           |                                               |                            |              |              |              |                                                                                                  |       |                                     |  |
|----|-----------|-----------------------------------------------|----------------------------|--------------|--------------|--------------|--------------------------------------------------------------------------------------------------|-------|-------------------------------------|--|
|    |           |                                               |                            |              |              |              | 83.01<br>29                                                                                      |       |                                     |  |
| 13 | 5.5<br>49 | cis-3-<br>Hexeny<br>l b-<br>primev<br>eroside | $C_{17}H_{30}$<br>$O_{10}$ | 393.<br>1765 | 394.1<br>838 | 394.1<br>838 | 393.1<br>765,<br>161.0<br>450,<br>163.8<br>716,<br>101.0<br>246,<br>119.0<br>506,<br>59.01<br>37 | 97.52 | O-acyl<br>carbohy<br>drate          |  |
| 14 | 6.0<br>68 | Fraxin                                        | $C_{16}H_{18}$<br>$O_{10}$ | 369.<br>0829 | 370.0<br>901 | 370.0<br>899 | 161.0<br>245,<br>119.0<br>536<br>369.0<br>830,<br>133.0<br>576                                   | 96.41 | Coumar<br>in<br>glycosi<br>de       |  |
| 15 | 6.2<br>11 | p-<br>Coumar<br>oyl<br>quinic<br>acid*        | $C_{16}H_{18}$<br>$O_8$    | 337.<br>0932 | 338.1<br>004 | 338.1<br>001 | 337.0<br>932,<br>191.0<br>562,<br>163.0<br>402,<br>119.0<br>459                                  | 95.65 | Phenoli<br>c acid<br>ester          |  |
| 16 | 6.2<br>63 | Catechi<br>n*                                 | $C_{15}H_{14}$<br>$O_6$    | 289.<br>0718 | 290.0<br>773 | 290.0<br>790 | 245.0<br>807,<br>203.0<br>701,<br>179.0<br>342,<br>109.0<br>292,<br>57.03<br>45                  | 95.34 | Flavon<br>oid<br>(Flavan<br>- 3-ol) |  |

|    |           |                         |                      |          |          |          |                                                                    |       |                             |  |
|----|-----------|-------------------------|----------------------|----------|----------|----------|--------------------------------------------------------------------|-------|-----------------------------|--|
| 17 | 6.6<br>97 | Verbenalin              | $C_{17}H_{24}O_{10}$ | 387.1297 | 388.1370 | 388.1370 | 387.1297, 207.0673, 181.0869, 123.0454, 59.0135, 89.0241           | 94.63 | Iridoid glycoside           |  |
| 18 | 6.9<br>13 | Secoxyloganin*          | $C_{17}H_{24}O_{11}$ | 403.1226 | 404.1299 | 404.1318 | 357.1186, 179.0528, 149.0463                                       | 98.91 | Terpene (Iridoid glycoside) |  |
| 19 | 7.1<br>24 | Cynaroside A*           | $C_{21}H_{32}O_{10}$ | 443.1920 | 444.1992 | 444.1995 | 443.1920, 237.0738, 219.8699, 179.0561, 131.0331, 89.0247, 59.0134 | 93.42 | Sesquiterpene glycoside     |  |
| 20 | 7.4<br>28 | Oleoside dimethyl ester | $C_{18}H_{26}O_{11}$ | 417.1400 | 418.1476 | 418.1475 | 417.1400, 297.0965, 209.0820, 179.0351, 161.0448,                  | 95.62 | Terpene glycoside           |  |

|    |           |                            |                                                    |              |              |               |                                                                                                 |       |                                      |                                                                                       |
|----|-----------|----------------------------|----------------------------------------------------|--------------|--------------|---------------|-------------------------------------------------------------------------------------------------|-------|--------------------------------------|---------------------------------------------------------------------------------------|
|    |           |                            |                                                    |              |              |               | 89.02<br>43                                                                                     |       |                                      |                                                                                       |
| 21 | 8.2<br>17 | 6-Hydroxy-alpha-pyrufuran* | C <sub>15</sub> H <sub>14</sub><br>O <sub>6</sub>  | 289.<br>0717 | 290.0<br>790 | 290.0<br>790  | 289.0<br>715,<br>201.0<br>555<br>109.0<br>296                                                   | 94.71 | Heterocyclic compound                | 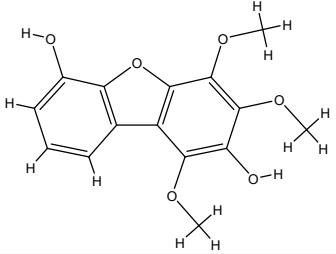   |
| 22 | 8.4<br>07 | 6-O-Oleuropeoylsucrose     | C <sub>22</sub> H <sub>36</sub><br>O <sub>13</sub> | 507.<br>2077 | 508.2<br>154 | 508.2<br>155  | 507.2<br>076,<br>345.1<br>357<br>209.9<br>557,<br>256.0<br>737<br>161.0<br>460,<br>131.0<br>359 | 97.82 | Alicyclic disaccharide               |    |
| 23 | 8.8<br>98 | Umbelliferone              | C <sub>9</sub> H <sub>6</sub> O <sub>3</sub>       | 161.<br>0244 | 162.0<br>305 | 162.0<br>304  | 133.0<br>288,<br>77.03<br>92                                                                    | 95.21 | Coumarin                             |   |
| 24 | 8.9<br>32 | m-Coumaric acid            | C <sub>9</sub> H <sub>8</sub> O <sub>3</sub>       | 163.<br>0393 | 164.0<br>465 | 164.0<br>4734 | 119.0<br>494,<br>93.03<br>35                                                                    | 96.11 | Phenolic acid (Hydroxycinnamic acid) |  |
| 25 | 9.3<br>53 | Coniferin*                 | C <sub>16</sub> H <sub>22</sub><br>O <sub>8</sub>  | 341.<br>1239 | 342.1<br>313 | 342.1<br>314  | 341.1<br>239,<br>161.0<br>602<br>59.01<br>33,<br>73.02<br>85                                    | 93.14 | Phenolic acid glycoside              |  |
| 26 | 9.5<br>68 | Sambac in*                 | C <sub>26</sub> H <sub>36</sub><br>O <sub>12</sub> | 539.<br>2137 | 540.2<br>209 | 540.2<br>206  | 539.2<br>132<br>329.1<br>390<br>195.0                                                           | 92.10 | Phenolic glycoside                   |  |

|    |        |                                   |                                                 |          |          |          |                                                                                                |       |                           |                                                                                       |
|----|--------|-----------------------------------|-------------------------------------------------|----------|----------|----------|------------------------------------------------------------------------------------------------|-------|---------------------------|---------------------------------------------------------------------------------------|
|    |        |                                   |                                                 |          |          |          | 662<br>59.01<br>37                                                                             |       |                           |                                                                                       |
| 27 | 10.121 | Diosbulbinoside F                 | C <sub>26</sub> H <sub>34</sub> O <sub>12</sub> | 537.1983 | 538.2055 | 538.2050 | 537.1983,<br>491.1924<br>315.1239,<br>345.1344<br>161.0457                                     | 92.38 | Terpene glycoside         | 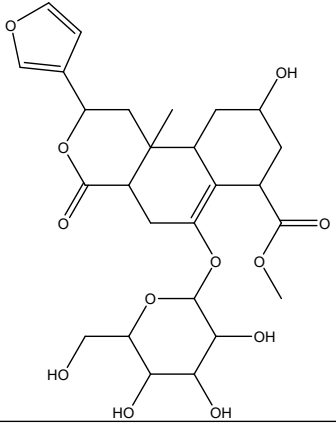   |
| 28 | 10.231 | Citrusin B                        | C <sub>27</sub> H <sub>36</sub> O <sub>13</sub> | 567.2092 | 568.2158 | 568.2155 | 567.2093,<br>429.4083<br>211.0626,<br>181.0849<br>135.0446,<br>165.0571<br>89.0262,<br>58.8192 | 92.87 | Phenol (Lignan glycoside) |   |
| 29 | 10.357 | 1,5-Dibutylmethylhydroxycitrate * | C <sub>15</sub> H <sub>26</sub> O <sub>8</sub>  | 333.1553 | 334.1626 | 334.1627 | 333.1554,<br>234.8990<br>175.1022,<br>101.0240<br>59.0135                                      | 91.39 | Aliphatic ester           |  |



|    |        |                                |                      |          |          |          |                                                 |       |                       |                                                                                       |
|----|--------|--------------------------------|----------------------|----------|----------|----------|-------------------------------------------------|-------|-----------------------|---------------------------------------------------------------------------------------|
| 30 | 11.176 | Zizyboside I                   | $C_{19}H_{28}O_{11}$ | 431.1558 | 432.1631 | 432.1631 | 431.1558, 145.9314, 89.0244, 59.0138            | 95.19 | Phenolic glycoside    | 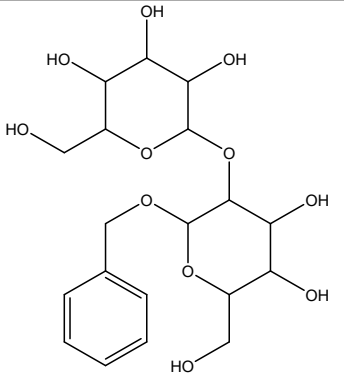   |
| 31 | 11.615 | Aromadendrin                   | $C_{15}H_{12}O_6$    | 287.0562 | 288.0635 | 288.2501 | 287.0562, 151.0029, 125.0245, 83.0138, 194.9717 | 98.78 | Flavan-3-ol           |    |
| 32 | 11.716 | Hyperoside                     | $C_{21}H_{20}O_{12}$ | 463.0882 | 464.0955 | 464.4123 | 463.0888, 465.097, 271.0256                     | 96.19 | Flavonol glycoside    |   |
| 33 | 11.775 | Austalide C                    | $C_{30}H_{38}O_{11}$ | 573.2341 | 574.2414 | 574.2414 | 463.0888, 465.0972, 271.0256                    | 97.18 | Heterocyclic compound |  |
| 34 | 12.337 | Gibberellin A1 glucosyl ester* | $C_{25}H_{34}O_{11}$ | 509.2034 | 510.2106 | 510.2101 | 509.2031, 179.0715, 59.0137, 89.0244            | 94.18 | Diterpene glycoside   |  |

|    |        |                                           |                                                    |          |          |          |                                                                                                   |       |                           |                                                                                       |
|----|--------|-------------------------------------------|----------------------------------------------------|----------|----------|----------|---------------------------------------------------------------------------------------------------|-------|---------------------------|---------------------------------------------------------------------------------------|
| 35 | 12.457 | Rutin*                                    | C <sub>27</sub> H <sub>30</sub><br>O <sub>16</sub> | 609.1431 | 610.1504 | 610.1533 | 343.045,<br>300.0262,<br>271.0238,<br>178.9976                                                    | 95.16 | Flavonoid<br>(Flavonol)   | 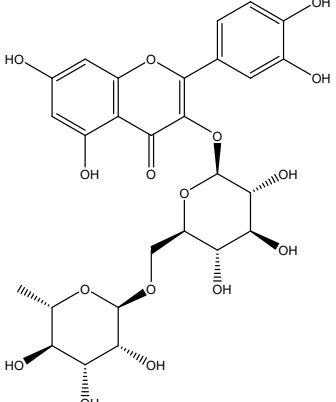   |
| 36 | 12.594 | Mascaroside*                              | C <sub>26</sub> H <sub>36</sub><br>O <sub>11</sub> | 523.2242 | 524.2262 | 524.2257 | 475.1940,<br>327.1593,<br>165.0560,<br>133.0271                                                   | 98.45 | Heterocyclic compound     |    |
| 37 | 12.742 | Ethyl 7-epi-12-hydroxyjasmonate glucoside | C <sub>20</sub> H <sub>32</sub><br>O <sub>9</sub>  | 415.1975 | 416.2048 | 416.2046 | 415.1975,<br>369.1942,<br>235.7253,<br>209.0821,<br>161.0457,<br>179.0561,<br>89.0241,<br>59.0136 | 96.71 | Carboxylic acid glycoside |   |
| 38 | 13.451 | Prupaside*                                | C <sub>27</sub> H <sub>36</sub><br>O <sub>12</sub> | 551.2142 | 552.2213 | 552.2206 | 551.2141,<br>375.9805,<br>165.0566,<br>101.0238                                                   | 92.10 | Lignan glycoside          |  |

|    |        |                                                                    |                      |          |          |          |                                                  |       |                   |                                                                                       |
|----|--------|--------------------------------------------------------------------|----------------------|----------|----------|----------|--------------------------------------------------|-------|-------------------|---------------------------------------------------------------------------------------|
| 39 | 13.555 | Apigenin 7-glucoside                                               | $C_{21}H_{20}O_{10}$ | 431.1029 | 432.1029 | 432.1028 | 268.0363, 240.0409, 177.9781, 121.0293           | 92.19 | Flavone glucoside | 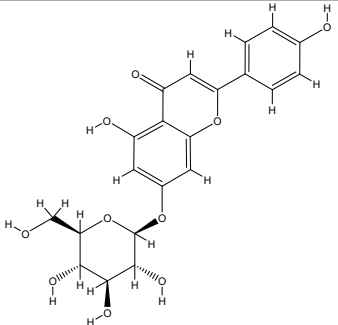   |
| 40 | 13.685 | 17beta-Hydroxy-4-mercaptandrost-4-en-3-one 4-acetate 17-propionate | $C_{24}H_{34}O_4S$   | 417.2106 | 418.2181 | 418.2171 | 371.2065, 230.2044, 209.1532, 161.0444, 101.0245 | 96.10 | Steroid ester     |    |
| 41 | 14.174 | Naringenin 5-O-glucuronide                                         | $C_{21}H_{20}O_{11}$ | 447.0933 | 448.1005 | 448.1005 | 447.0931, 255.0297, 151.0041, 59.0139, 89.0241   | 95.19 | Flavone glucoside |   |
| 42 | 14.284 | 3',7-Dimethoxy-4',5,8-trihydroxyflavone 8-glucoside                | $C_{23}H_{24}O_{12}$ | 491.1192 | 492.1264 | 492.1267 | 491.1192, 313.0344, 285.0401                     | 92.18 | Flavone glycoside |  |

|    |        |                           |                         |          |          |          |                                                |       |                         |                                                                                       |
|----|--------|---------------------------|-------------------------|----------|----------|----------|------------------------------------------------|-------|-------------------------|---------------------------------------------------------------------------------------|
| 43 | 15.196 | Cappari loside B          | $C_{22}H_{28}N_2O_{11}$ | 495.1638 | 496.1692 | 496.1693 | 495.1627, 89.0246, 101.0243, 71.0142           | 98.17 | Heterocyclic compound   | 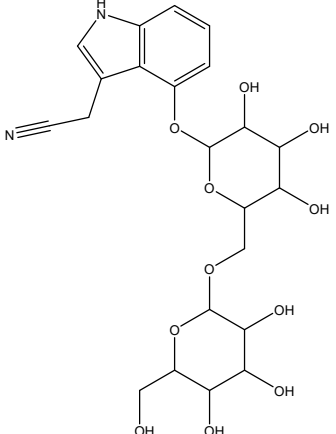   |
| 44 | 16.458 | Nerylrh amnosyl-glucoside | $C_{22}H_{38}O_{10}$    | 461.2394 | 462.2466 | 462.2464 | 461.2394, 59.0137, 101.0244, 71.0138, 161.0454 | 97.68 | Terpene glycoside       |    |
| 45 | 16.459 | Naringenin*               | $C_{15}H_{12}O_5$       | 271.0612 | 272.0668 | 272.0684 | 243.9003, 151.0035, 94.9251, 65.0032           | 95.16 | Flavonoid               |  |
| 46 | 16.842 | Theaflavate B*            | $C_{36}H_{28}O_{15}$    | 699.1357 | 700.1429 | 700.1428 | 537.0806, 375.0491, 257.0093, 137.0236         | 94.13 | Flavonoid (Flavan-3-ol) |  |

|    |        |                    |                      |          |          |          |                                                                           |       |                                  |  |
|----|--------|--------------------|----------------------|----------|----------|----------|---------------------------------------------------------------------------|-------|----------------------------------|--|
| 47 | 16.851 | Capsian<br>oside V | $C_{26}H_{42}O_{10}$ | 513.2701 | 514.2773 | 514.2777 | 513.2700,<br>469.2483,<br>179.0583,<br>161.0445,<br>59.0140,<br>71.0133   | 97.28 | Terpen<br>e<br>glycosi<br>de     |  |
| 48 | 17.581 | Luteolin           | $C_{15}H_{10}O_6$    | 285.0405 | 286.0461 | 286.0462 | 257.0436,<br>249.0184,<br>199.0381,<br>151.0023,<br>133.0281,<br>107.0129 | 98.14 | Flavano<br>id<br>(Flavon<br>e)   |  |
| 49 | 17.983 | Pinoqu<br>ercetin  | $C_{16}H_{12}O_7$    | 315.0497 | 316.0570 | 316.0571 | 300.0260,<br>272.0319,<br>148.0147                                        | 92.38 | Flavano<br>id<br>(Flavon<br>e)   |  |
| 50 | 18.970 | APC                | $C_{33}H_{38}N_4O_8$ | 617.2614 | 618.2686 | 618.2689 | 617.2614,<br>587.2532                                                     | 94.52 | Heteroc<br>yclic<br>compou<br>nd |  |
| 51 | 18.973 | Emodin             | $C_{15}H_{10}O_5$    | 269.0455 | 270.0511 | 270.0528 | 225.0537,<br>149.0239,<br>117.0342,<br>65.0027                            | 96.67 | Anthra<br>quinone                |  |

|    |        |                      |                      |          |          |          |                                                  |       |             |  |
|----|--------|----------------------|----------------------|----------|----------|----------|--------------------------------------------------|-------|-------------|--|
| 52 | 19.934 | Robustaflavone*      | $C_{30}H_{18}O_{10}$ | 537.0833 | 538.0905 | 538.5    | 444.0530, 375.051, 331.0613, 117.0345            | 95.18 | Biflavonoid |  |
| 53 | 20.084 | Cupressoflavone*     | $C_{30}H_{18}O_{10}$ | 537.0836 | 538.0908 | 538.0913 | 537.0825, 443.0407, 417.0314, 375.0512, 151.0034 | 97.18 | Biflavonoid |  |
| 54 | 21.369 | Myrsinone*           | $C_{17}H_{26}O_4$    | 293.1759 | 294.1832 | 294.1831 | 236.1049, 221.1540, 177.0930, 148.0535, 96.9584  | 95.09 | Quinone     |  |
| 55 | 21.580 | n-acetyltylophamine* | $C_{10}H_{13}NO_3$   | 194.0822 | 195.0894 | 195.0895 | 194.0825, 150.9773, 153.1286, 58.6112            | 94.16 | Carboxamide |  |

|    |        |                                                           |                      |          |          |          |                                                              |       |                       |                                                                                       |
|----|--------|-----------------------------------------------------------|----------------------|----------|----------|----------|--------------------------------------------------------------|-------|-----------------------|---------------------------------------------------------------------------------------|
| 56 | 21.702 | 3-beta-hydroxy-9-beta-primara-7,15-diene-19,6 beta-olide* | $C_{20}H_{28}O_3$    | 315.0214 | 316.4011 | 316.4012 | 278.0210<br>209.1129<br>117.0987                             | 93.98 | Terpene (Diterpenoid) | 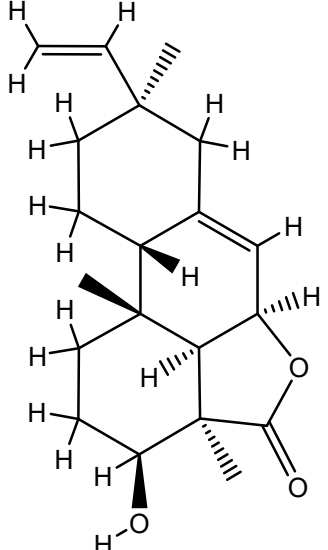   |
| 57 | 21.973 | Picrasin C                                                | $C_{23}H_{34}O_7$    | 421.2245 | 422.2316 | 422.232  | 315.2047,<br>227.1292,<br>129.0199,<br>80.9646               | 97.45 | Terpene (Iridoid)     |   |
| 58 | 22.045 | Amentoflavone                                             | $C_{30}H_{18}O_{10}$ | 537.0828 | 538.0905 | 538.0899 | 537.0833,<br>443.0406,<br>375.0512,<br>417.0615,<br>117.0346 | 96.39 | Biflavonoid           |  |
| 59 | 23.073 | (±)12-Hydroxy-5,8,10,14-eicosatetraenoic acid (HETE)*     | $C_{20}H_{32}O_3$    | 319.2281 | 320.2354 | 320.2351 | 319.2279,<br>225.2876,<br>96.9603                            | 96.28 | Eicosanoid            |  |

|    |        |                            |                      |          |          |          |                             |       |                          |                                                                                      |
|----|--------|----------------------------|----------------------|----------|----------|----------|-----------------------------|-------|--------------------------|--------------------------------------------------------------------------------------|
| 60 | 24.171 | Phytocassane C*            | $C_{20}H_{30}O_3$    | 317.2124 | 318.2197 | 318.2194 | 317.2122, 271.2062, 83.0501 | 97.17 | Terpene (Diterpenoid)    | 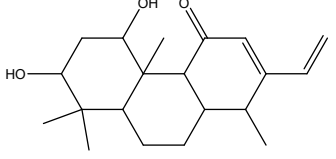  |
| 61 | 25.078 | Sarcostin                  | $C_{21}H_{34}O_6$    | 381.2296 | 382.2369 | 382.235  | 313.2144, 146.8670, 96.9595 | 93.19 | Steroid (Corticosteroid) |   |
| 62 | 27.034 | Kukoamine D                | $C_{28}H_{42}N_4O_6$ | 529.3026 | 530.3097 | 530.3091 | 264.7739, 198.0158, 96.9593 | 92.20 | Phenol (Catechol)        |   |
| 63 | 27.601 | L-Oleandrosyl-oleandrolide | $C_{27}H_{46}O_{10}$ | 529.3026 | 530.3095 | 530.3092 | 471.2638, 195.747, 96.9595  | 91.05 | Macrolide                |  |

\*Marker compound
